# Supplementary material for: Asymmetric additions of thioglycolates and N-Boc aldimines catalyzed by a bifunctional tertiary-amine squaramide
Source: Royal Society of Chemistry journal article supplement (doi:10.1039/c6ob01645f), 2016-01-01
Supplement: c6ob01645f1.pdf [file c6ob01645f1.pdf]

**Asymmetric additions of thioglycolates and N-Boc aldimines  
catalyzed by a bifunctional tertiary-amine squaramide**

Bo-Xu Feng,<sup>a</sup> Bin Wang<sup>b\*</sup> and Xin Li<sup>a\*</sup>

<sup>a.</sup> *State Key Laboratory of Elemento-Organic Chemistry, Collaborative Innovation Center of Chemical Science and Engineering, Department of Chemistry, Nankai University, Tianjin 300071 (P. R. China). Collaborative Innovation Center of Chemical Science and Engineering, Tianjin 300071.*

<sup>b.</sup> *Tianjin Key Laboratory of Structure and Performance for Functional Molecule, College of Chemistry, Tianjin Normal University, Tianjin 300387, China.*

**Table of Contents**

|                                                              |    |
|--------------------------------------------------------------|----|
| General Information.....                                     | 2  |
| General experimental reaction procedure: .....               | 2  |
| ORTEP Drawing of Compound 3j:.....                           | 9  |
| NMR Spectra ( <sup>1</sup> H NMR, <sup>13</sup> C NMR) ..... | 12 |
| HPLC Spectrum .....                                          | 28 |
| Reference .....                                              | 44 |

## General Information

Commercial reagents were used as received, unless otherwise stated.  $^1\text{H}$  and  $^{13}\text{C}$  NMR were recorded on 400 MHz spectrometer. Chemical shifts are reported in ppm from tetramethylsilane with the solvent resonance as the internal standard. The following abbreviations were used to designate chemical shift multiplicities: s = singlet, d = doublet, t = triplet, q = quartet, m = multiplet. All first-order splitting patterns were assigned on the basis of the appearance of the multiplet. Splitting patterns that could not be easily interpreted are designated as multiplet (m). Mass spectra were obtained using electrospray ionization (ESI) or electron impact ionization (EI) mass spectrometer. In each case, enantiomeric ratio was determined by chiral HPLC analysis on Chiralcel column in comparison with authentic racemates. N-Boc aldimines **1a-o** were prepared according to previously reported procedures.<sup>1</sup>

## General experimental reaction procedure:

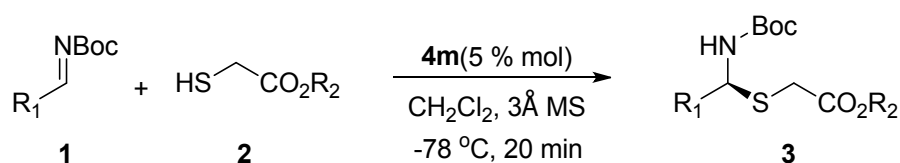

To a 10-mL test-tube were sequentially added catalyst (0.005 equiv),  $\text{CH}_2\text{Cl}_2$  (2.0 mL), 80mg 3 Å molecular sieves and the Boc-protected imine **1** (1.0 equiv). The mixture was cooled to  $-78\text{ }^\circ\text{C}$  and stirred for 30 min. Alkyl thioglycolate (0.24 mmol) was then added. The reaction mixture was stirred at  $-78\text{ }^\circ\text{C}$  and monitored by TLC. Upon completion, the residual was purified by silica gel flash chromatography (petroleum ether: ethyl acetate, 5:1) to afford the desired product.

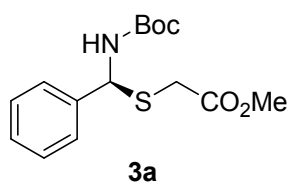

The title compound was prepared according to general procedure to get colorless oil (57.9 mg, 93%).  $[\alpha]^{25}_{\text{D}} = -5.4$  ( $c = 1.00$ ,  $\text{CHCl}_3$ );  $^1\text{H}$

NMR (400 MHz, Chloroform-d)  $\delta$  7.41 (d,  $J$  = 7.0 Hz, 2H), 7.37 – 7.33 (m, 2H), 7.31 – 7.26 (m, 1H), 6.14 (d,  $J$  = 9.8 Hz, 1H), 5.65 (d,  $J$  = 9.8 Hz, 1H), 3.74 (s, 3H), 3.32 (dd,  $J$  = 15.9 Hz, 2H), 1.45 (s, 9H).  $^{13}\text{C}$  NMR (100 MHz, Chloroform-d)  $\delta$  171.23, 154.54, 138.58, 128.70, 128.26, 126.51, 80.30, 59.05, 52.63, 32.79, 28.29. HRMS (ESI) Exact mass calcd for  $\text{C}_{15}\text{H}_{21}\text{NO}_4\text{S}$   $[\text{M}+\text{Na}]^+$  : 334.1089, found 334.1079. Enantiomeric excess was determined by HPLC with an OD-H column at 210 nm (2-propanol: hexane = 3:97), 1.0 mL/min;  $t_{\text{R}}$  = 12.4 min (minor), 13.4 min (major).

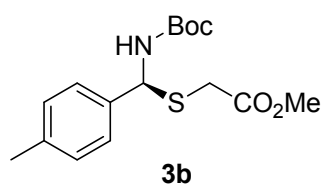

The title compound was prepared according to general procedure to get yellow oil (68.3 mg, 97%).  $[\alpha]_{\text{D}}^{25} = -3.8$  ( $c$  = 1.00,  $\text{CHCl}_3$ );  $^1\text{H}$  NMR (400 MHz, Chloroform-d)  $\delta$  7.21 (d,  $J$  = 7.9 Hz, 2H), 7.07 (d,  $J$  = 7.8 Hz, 2H), 6.02 (d,  $J$  = 9.8 Hz, 1H), 5.56 (d,  $J$  = 9.9 Hz, 1H), 3.66 (s, 3H), 3.31 – 3.15 (dd, 2H), 2.25 (s, 3H), 1.36 (s, 9H).  $^{13}\text{C}$  NMR (100 MHz, Chloroform-d)  $\delta$  171.31, 154.55, 138.07, 135.61, 129.44, 126.49, 80.21, 58.88, 52.72, 32.83, 28.35, 21.21. HRMS (ESI) Exact mass calcd for  $\text{C}_{16}\text{H}_{23}\text{NO}_4\text{S}$   $[\text{M}+\text{Na}]^+$  : 348.1245, found 348.1239. Enantiomeric excess was determined by HPLC with an OD-H column at 210 nm (2-propanol: hexane = 3:97), 1.0 mL/min;  $t_{\text{R}}$  = 11.9 min (minor), 9.5 min (major).

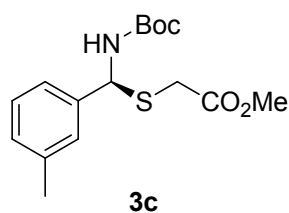

The title compound was prepared according to general procedure to get yellow oil (62.4 mg, 96%).  $[\alpha]_{\text{D}}^{25} = 1.0$  ( $c$  = 1.00,  $\text{CHCl}_3$ );  $^1\text{H}$  NMR (400 MHz, Chloroform-d)  $\delta$  7.28 – 7.18 (m, 3H), 7.12 – 7.08 (m, 1H), 6.09 (d,  $J$  = 9.8 Hz, 1H), 5.60 (d,  $J$  = 9.8 Hz, 1H), 3.75 (s, 3H), 3.43 – 3.25 (dd, 2H), 2.35 (s, 3H), 1.45 (s, 9H).  $^{13}\text{C}$  NMR (100 MHz, Chloroform-d)  $\delta$  171.24, 154.54, 138.48, 135.28, 129.06, 128.60, 127.17, 123.48, 80.26, 59.07, 52.62, 32.89, 28.29, 21.42. HRMS (ESI) Exact mass calcd for  $\text{C}_{16}\text{H}_{23}\text{NO}_4\text{S}$   $[\text{M}+\text{Na}]^+$  : 348.1245, found 348.1239. Enantiomeric excess was determined by HPLC with an OD-H column at 210 nm (2-propanol: hexane = 1:19), 1.0 mL/min;  $t_{\text{R}}$  = 8.6 min (minor), 7.4 min (major).

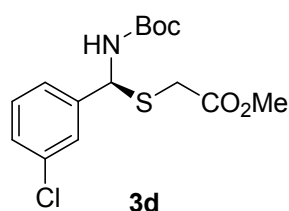

The title compound was prepared according to general procedure to

get colorless oil (63.5 mg, 92%).  $[\alpha]^{25}_D = -3.8$  ( $c = 1.00$ ,  $\text{CHCl}_3$ );  $^1\text{H}$  NMR (400 MHz, Chloroform- $d$ )  $\delta$  7.41 (d,  $J = 2.1$  Hz, 1H), 7.30 – 7.25 (m, 3H), 6.10 (d,  $J = 9.6$  Hz, 1H), 5.77 (d,  $J = 9.6$  Hz, 1H), 3.75 (s, 3H), 3.38 – 3.25 (dd, 2H), 1.45 (s, 9H).  $^{13}\text{C}$  NMR (100 MHz, Chloroform- $d$ )  $\delta$  171.17, 154.54, 140.68, 134.57, 129.97, 128.40, 126.75, 124.84, 80.55, 58.35, 52.74, 32.72, 28.28. HRMS (ESI) Exact mass calcd for  $\text{C}_{15}\text{H}_{20}\text{ClNO}_4\text{S}$   $[\text{M}+\text{Na}]^+$  : 368.0699, found 368.0696. Enantiomeric excess was determined by HPLC with an AD-H column at 210 nm (2-propanol: hexane = 1:19), 1.0 mL/min;  $t_R = 11.1$  min (minor), 11.8 min (major).

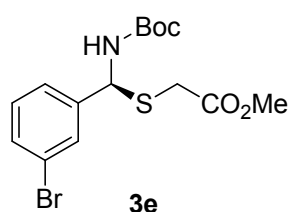

The title compound was prepared according to general procedure to get yellow oil (52.6 mg, 91%).  $[\alpha]^{25}_D = -6.6$  ( $c = 1.00$ ,  $\text{CHCl}_3$ );  $^1\text{H}$  NMR (400 MHz, Chloroform- $d$ )  $\delta$  7.49 (t,  $J = 1.9$  Hz, 1H), 7.34 (dt,  $J = 7.9, 1.4$  Hz, 1H), 7.27 (dt,  $J = 7.9, 1.2$  Hz, 1H), 7.14 (t,  $J = 7.8$  Hz, 1H), 6.01 (d,  $J = 9.6$  Hz, 1H), 5.67 (d,  $J = 9.7$  Hz, 1H), 3.68 (s, 3H), 3.31 – 3.14 (dd, 2H), 1.38 (s, 9H).  $^{13}\text{C}$  NMR (100 MHz, Chloroform- $d$ )  $\delta$  171.17, 154.52, 140.89, 131.41, 130.30, 129.68, 125.32, 122.72, 80.56, 58.27, 52.86, 32.74, 28.33. HRMS (ESI) Exact mass calcd for  $\text{C}_{15}\text{H}_{20}\text{BrNO}_4\text{S}$   $[\text{M}+\text{NH}_4]^+$  : 407.0640, found 407.0626. Enantiomeric excess was determined by HPLC with an AD-H column at 210 nm (2-propanol: hexane = 1:9), 1.0 mL/min;  $t_R = 7.7$  min (minor), 8.2 min (major).

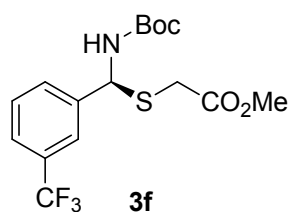

The title compound was prepared according to general procedure to get colorless oil (69.0 mg, 91%).  $[\alpha]^{25}_D = -3.6$  ( $c = 1.00$ ,  $\text{CHCl}_3$ );  $^1\text{H}$  NMR (400 MHz, Chloroform- $d$ )  $\delta$  7.67 (s, 1H), 7.62 (d,  $J = 7.8$  Hz, 1H), 7.56 (d,  $J = 7.8$  Hz, 1H), 7.48 (t,  $J = 7.7$  Hz, 1H), 6.17 (d,  $J = 9.5$  Hz, 1H), 5.77 (d,  $J = 9.5$  Hz, 1H), 3.76 (s, 3H), 3.32 (dd,  $J = 3.9$  Hz, 2H), 1.46 (s, 9H).  $^{13}\text{C}$  NMR

(100 MHz, Chloroform-d)  $\delta$  171.13, 154.59, 139.76, 130.89, 130.09, 129.24, 125.11, 123.36, 122.51, 80.71, 58.45, 52.80, 32.77, 28.26. HRMS (ESI) Exact mass calcd for  $C_{16}H_{20}F_3NO_4S$   $[M+Na]^+$  : 402.0963, found 402.0958. Enantiomeric excess was determined by HPLC with an AD-H column at 210 nm (2-propanol: hexane = 3:97), 1.0 mL/min;  $t_R$  = 10.8 min (minor), 11.9 min (major).

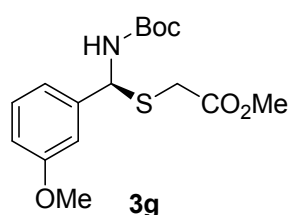

The title compound was prepared according to general procedure to get colorless oil (64.8 mg, 95%).  $[\alpha]^{25}_D = 3.6$  ( $c = 0.50$ ,  $CHCl_3$ );  $^1H$  NMR (400 MHz, Chloroform-d)  $\delta$  7.22 – 7.14 (m, 1H), 6.95 – 6.89 (m, 1H), 6.87 (t,  $J = 2.1$  Hz, 1H), 6.75 (dd,  $J = 8.2, 2.6$  Hz, 1H), 6.02 (d,  $J = 9.8$  Hz, 1H), 5.64 (d,  $J = 9.8$  Hz, 1H), 3.71 (s, 3H), 3.66 (s, 3H), 3.25 (dd,  $J = 15.9$  Hz, 2H), 1.37 (s, 9H).  $^{13}C$  NMR (100 MHz, Chloroform-d)  $\delta$  171.28, 159.78, 154.57, 140.11, 129.77, 118.77, 113.84, 112.15, 80.29, 58.97, 55.28, 52.65, 32.80, 28.30. HRMS (ESI) Exact mass calcd for  $C_{16}H_{23}NO_5S$   $[M+Na]^+$  : 364.1195, found 364.1194. Enantiomeric excess was determined by HPLC with an AD-H column at 210 nm (2-propanol: hexane = 1:9), 1.0 mL/min;  $t_R$  = 11.8 min (minor), 14.8 min (major).

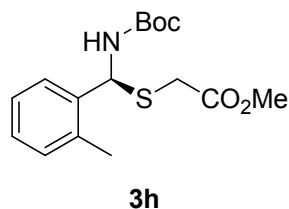

The title compound was prepared according to general procedure to get white solid (57.2 mg, 88%).  $[\alpha]^{25}_D = -13.4$  ( $c = 0.50$ ,  $CHCl_3$ );  $^1H$  NMR (400 MHz, Chloroform-d)  $\delta$  7.29 – 7.25 (m, 1H), 7.16 – 7.04 (m, 3H), 6.17 (d,  $J = 9.7$  Hz, 1H), 5.65 (d,  $J = 9.7$  Hz, 1H), 3.68 (s, 3H), 3.37 – 3.14 (dd, 2H), 2.39 (s, 3H), 1.36 (s, 9H).  $^{13}C$  NMR (100 MHz, Chloroform-d)  $\delta$  171.24, 154.59, 136.82, 135.21, 130.90, 128.22, 126.24, 125.55, 80.22, 55.91, 52.64, 32.94, 28.31, 19.07. HRMS (ESI) Exact mass calcd for  $C_{16}H_{23}NO_4S$   $[M+Na]^+$  : 348.1245, found 348.1242. Enantiomeric excess was determined by HPLC with an OD-H column at 210 nm (2-propanol: hexane = 1:9), 1.0 mL/min;  $t_R$  = 7.0 min (minor), 6.4 min (major).

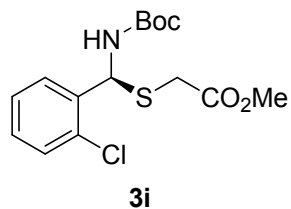

The title compound was prepared according to general procedure to get yellow oil (64.2 mg, 93%).  $[\alpha]^{25}$

$D = 7.4$  ( $c = 1.00$ ,  $\text{CHCl}_3$ );  $^1\text{H}$  NMR (400 MHz, Chloroform- $d$ )  $\delta$  7.44 (d,  $J = 7.4$  Hz, 1H), 7.38 (dd,  $J = 7.3$ , 1.8 Hz, 1H), 7.26 (qd,  $J = 7.1$ ,

2.1 Hz, 2H), 6.39 (d,  $J = 9.3$  Hz, 1H), 5.93 (d,  $J = 9.4$  Hz, 1H), 3.76 (s, 3H), 3.48 – 3.27 (dd, 2H), 1.44 (s, 9H).  $^{13}\text{C}$  NMR (100 MHz, Chloroform- $d$ )  $\delta$  171.24, 154.38, 136.28, 132.44, 130.24, 129.46, 127.77, 127.05, 80.41, 56.60, 52.75, 33.18, 28.29. HRMS (ESI) Exact mass calcd for  $\text{C}_{15}\text{H}_{20}\text{ClNO}_4\text{S}$   $[\text{M}+\text{Na}]^+$  : 368.0699, found 368.0696. Enantiomeric excess was determined by HPLC with an OD-H column at 210 nm (2-propanol: hexane = 1:4), 1.0 mL/min;  $t_R = 6.0$  min (minor), 5.5 min (major).

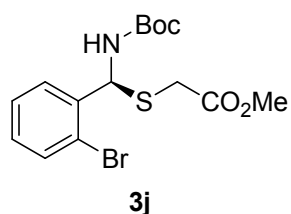

The title compound was prepared according to general procedure to get white solid (73.1 mg, 94%).  $[\alpha]^{25}D = 5.8$  ( $c = 1.00$ ,  $\text{CHCl}_3$ );  $^1\text{H}$

NMR (400 MHz, Chloroform- $d$ )  $\delta$  7.57 (dd,  $J = 8.0$ , 1.2 Hz, 1H), 7.43 (d,  $J = 7.8$  Hz, 1H), 7.32 (td,  $J = 7.6$ , 1.2 Hz, 1H), 7.16 (td,  $J = 7.7$ , 1.7

Hz, 1H), 6.35 (d,  $J = 9.2$  Hz, 1H), 5.88 (d,  $J = 9.2$  Hz, 1H), 3.77 (s, 3H), 3.37 (dd,  $J = 6.3$  Hz, 2H), 1.44 (s, 9H).  $^{13}\text{C}$  NMR (100 MHz, Chloroform- $d$ )  $\delta$  171.22, 154.30, 137.94, 133.56, 129.69, 127.84, 122.65, 80.45, 59.02, 52.75, 33.25, 29.70, 28.29. HRMS (ESI) Exact mass calcd for  $\text{C}_{15}\text{H}_{20}\text{BrNO}_4\text{S}$   $[\text{M}+\text{Na}]^+$  : 412.0194, found 412.0184. Enantiomeric excess was determined by HPLC with an OD-H column at 210 nm (2-propanol: hexane = 1:4), 1.0 mL/min;  $t_R = 6.9$  min (minor), 6.0 min (major).

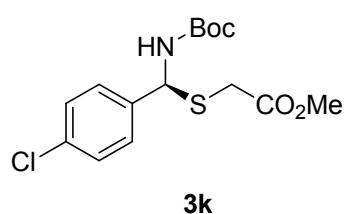

The title compound was prepared according to general procedure

to get colorless oil (62.1 mg, 90%).  $[\alpha]^{25}_D = 6.0$  ( $c = 0.50$ ,  $\text{CHCl}_3$ );  $^1\text{H}$  NMR (400 MHz, Chloroform- $d$ )  $\delta$  7.37 – 7.30 (m, 4H), 6.10 (d,  $J = 9.6$  Hz, 1H), 5.71 (d,  $J = 9.7$  Hz, 1H), 3.75 (s, 3H), 3.37 – 3.20 (dd, 2H), 1.45 (s, 9H).  $^{13}\text{C}$  NMR (100 MHz, Chloroform- $d$ )  $\delta$  171.25, 154.52, 137.18, 134.02, 128.84, 127.96, 80.52, 58.33, 52.75, 32.69, 28.29. HRMS (ESI) Exact mass calcd for  $\text{C}_{15}\text{H}_{20}\text{ClNO}_4\text{S}$   $[\text{M}+\text{Na}]^+$ : 368.0699, found 368.0696. Enantiomeric excess was determined by HPLC with an OD-H column at 210 nm (2-propanol: hexane = 3:97), 1.0 mL/min;  $t_R = 10.7$  min (minor), 9.7 min (major).

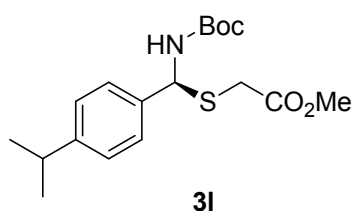

The title compound was prepared according to general procedure to get colorless oil (66.4 mg, 94%).  $[\alpha]^{25}_D = -2.4$  ( $c = 1.00$ ,  $\text{CHCl}_3$ );  $^1\text{H}$  NMR (400 MHz, Chloroform- $d$ )  $\delta$  7.44 (d,  $J = 7.4$  Hz, 1H), 7.38 (dd,  $J = 7.3, 1.8$  Hz, 1H), 7.26 (qd,  $J = 7.1, 2.1$  Hz, 2H), 6.39 (d,  $J = 9.3$  Hz, 1H), 5.93 (d,  $J = 9.4$  Hz, 1H), 3.76 (s, 3H), 3.44 – 3.27 (dd, 2H), 1.44 (s, 9H).  $^{13}\text{C}$  NMR (100 MHz, Chloroform- $d$ )  $\delta$  171.29, 154.55, 149.03, 135.94, 126.78, 126.46, 80.22, 58.95, 52.63, 33.82, 32.89, 28.31, 23.92. HRMS (ESI) Exact mass calcd for  $\text{C}_{18}\text{H}_{27}\text{NO}_4\text{S}$   $[\text{M}+\text{Na}]^+$ : 376.1558, found 376.1555. Enantiomeric excess was determined by HPLC with an OD-H column at 210 nm (2-propanol: hexane = 3:97), 1.0 mL/min;  $t_R = 9.0$  min (minor), 7.7 min (major).

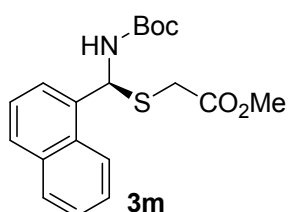

The title compound was prepared according to general procedure to get yellow oil (69.3 mg, 96%).  $[\alpha]^{25}_D = -1.2$  ( $c = 1.00$ ,  $\text{CHCl}_3$ );  $^1\text{H}$  NMR (400 MHz, Chloroform- $d$ )  $\delta$  8.30 (d,  $J = 8.6$  Hz, 1H), 7.84 (d,  $J = 8.1$  Hz, 1H), 7.79 (d,  $J = 8.2$  Hz, 1H), 7.57 (t,  $J = 8.2$  Hz, 2H), 7.49 (t,  $J = 7.5$  Hz, 1H), 7.42 (t,  $J = 7.7$  Hz, 1H), 6.87 (d,  $J = 9.6$  Hz, 1H), 5.95 (d,  $J = 9.6$  Hz, 1H), 3.75 (s, 3H), 3.35 (dd,  $J = 16.2$  Hz, 2H), 1.45 (s, 9H).  $^{13}\text{C}$  NMR (100 MHz, Chloroform- $d$ )  $\delta$  171.36, 154.69, 134.18, 133.93, 129.80, 129.22, 128.82, 126.66, 126.10, 125.02, 124.05, 123.48, 80.39,

55.91, 52.73, 33.06, 28.34. HRMS (ESI) Exact mass calcd for  $C_{19}H_{23}NO_4S$   $[M+Na]^+$  : 384.1245, found 384.1242. Enantiomeric excess was determined by HPLC with an OD-H column at 210 nm (2-propanol: hexane = 3:97), 1.0 mL/min;  $t_R$  = 15.3 min (minor), 18.4 min (major).

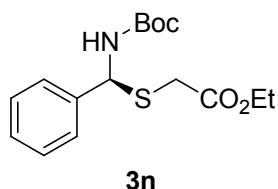

The title compound was prepared according to general procedure to get colorless oil (68.2 mg, 98%).  $[\alpha]^{25}_D$  = -1.2 ( $c$  = 1.00,  $CHCl_3$ );  $^1H$  NMR (400 MHz, Chloroform- $d$ )  $\delta$  7.37 – 7.29 (m, 2H), 7.24 – 7.15 (m, 2H), 6.11 (d,  $J$  = 9.8 Hz, 1H), 5.61 (d,  $J$  = 9.9 Hz, 1H), 3.74 (s, 3H), 3.42 – 3.22 (dd, 2H), 2.95 – 2.81 (m, 1H), 1.44 (s, 9H), 1.23 (d,  $J$  = 6.9 Hz, 6H).  $^{13}C$  NMR (100 MHz, Chloroform- $d$ )  $\delta$  170.82, 154.57, 138.61, 128.68, 128.21, 126.54, 80.24, 61.69, 58.92, 32.93, 28.31, 14.14. HRMS (ESI) Exact mass calcd for  $C_{16}H_{23}NO_4S$   $[M+Na]^+$  : 348.1245 found 348.1240. Enantiomeric excess was determined by HPLC with an OD-H column at 210 nm (2-propanol: hexane = 3:97), 1.0 mL/min;  $t_R$  = 19.7 min (minor), 18.6 min (major).

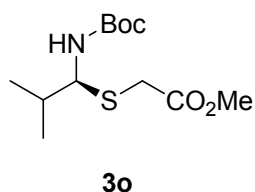

The title compound was prepared according to general procedure to get colorless oil (51.5 mg, 93%).  $[\alpha]^{25}_D$  = -22.0 ( $c$  = 1.00,  $CHCl_3$ );  $^1H$  NMR (400 MHz, Chloroform- $d$ )  $\delta$  4.88 (s, 2H), 3.74 (s, 3H), 3.53 – 3.21 (dd, 2H), 1.98 (s, 1H), 1.45 (s, 9H), 1.00 (d,  $J$  = 6.7 Hz, 6H).  $^{13}C$  NMR (100 MHz, Chloroform- $d$ )  $\delta$  171.01, 155.27, 79.85, 63.02, 52.46, 33.72, 32.47, 28.24, 19.30, 18.27. HRMS (ESI) Exact mass calcd for  $C_{12}H_{23}NO_4S$   $[M+Na]^+$  : 300.1240, found 300.1245. Enantiomeric excess was determined by HPLC with an AD-H column at 210 nm (2-propanol: hexane = 1:19), 1.0 mL/min;  $t_R$  = 7.9 min (minor), 8.9 min (major).

Cyclization of compound **3a** into compound **5**.<sup>2</sup>



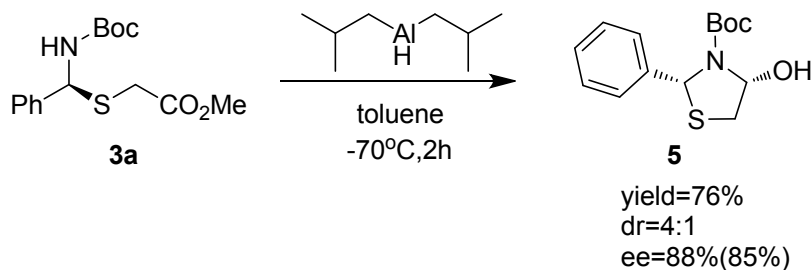

To the solution of the compound **3a** (622 mg) in dry toluene (12 ml), diisobutylaluminum hydride (1.01 N toluene solution; 2 ml) was slowly added at -70 °C. The mixture was stirred for 2 hours. A saturated aqueous solution of sodium sulfate was added to the reaction mixture, and then the mixture was filtrated at room temperature. The filtrate was concentrated in vacuo, the residue was purified by flash column chromatography (silica gel, ethyl acetate/petroleum ether 1:5) to give **5** (828mg, 76% yield, 88% ee) as a colorless oil.

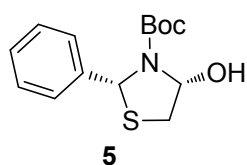

The title compound was prepared according to general procedure to get colorless oil (828 mg, 76%).  $[\alpha]_D^{25} = -186.0$  ( $c = 1.00$ ,  $\text{CHCl}_3$ );  $^1\text{H}$  NMR (400 MHz, Chloroform- $d$ )  $\delta$  7.44 (dd,  $J = 7.2, 1.9$  Hz, 2H), 7.32 (dd,  $J = 8.2, 6.4$  Hz, 2H), 7.28 – 7.25 (m, 1H), 5.93 (d,  $J = 59.9$  Hz, 2H), 4.18 (s, 1H), 3.29 (dd,  $J = 12.0, 4.9$  Hz, 1H), 3.09 (dd,  $J = 12.0, 3.3$  Hz, 1H), 1.19 (s, 9H).  $^{13}\text{C}$  NMR (100 MHz, Chloroform- $d$ )  $\delta$  153.37, 141.80, 128.34, 127.73, 126.40, 84.59, 81.49, 65.02, 36.84, 27.98. HRMS (ESI) Exact mass calcd for  $\text{C}_{14}\text{H}_{19}\text{NO}_3\text{S}$   $[\text{M}+\text{Na}]^+$  : 304.0983, found 304.0975. Enantiomeric excess was determined by HPLC with an AD-H column at 210 nm (2-propanol: hexane = 3:97), 1.0 mL/min;  $t_R = 11.2$  min (minor), 14.3 min (major).

**ORTEP Drawing of Compound 3j:**

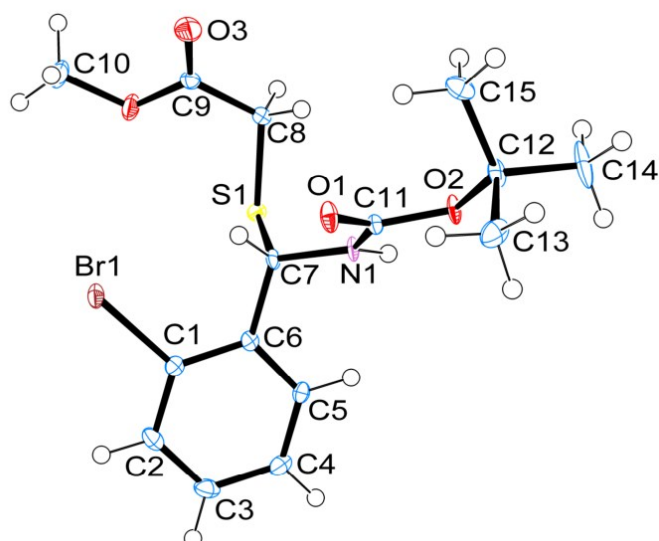

#### Crystal data and structure refinement for 3j

|                                 |                                                                                                                 |
|---------------------------------|-----------------------------------------------------------------------------------------------------------------|
| Identification code             | shelx                                                                                                           |
| Empirical formula               | C <sub>15</sub> H <sub>20</sub> Br N O <sub>4</sub> S                                                           |
| Formula weight                  | 390.29                                                                                                          |
| Temperature                     | 113(2) K                                                                                                        |
| Wavelength                      | 0.71073 Å                                                                                                       |
| Crystal system, space group     | Orthorhombic, P2(1)2(1)2(1)                                                                                     |
| Unit cell dimensions            | a = 5.1680(5) Å    alpha = 90 deg.<br>b = 10.0269(12) Å    beta = 90 deg.<br>c = 32.073(4) Å    gamma = 90 deg. |
| Volume                          | 1662.0(3) Å <sup>3</sup>                                                                                        |
| Z, Calculated density           | 4, 1.560 Mg/m <sup>3</sup>                                                                                      |
| Absorption coefficient          | 2.615 mm <sup>-1</sup>                                                                                          |
| F(000)                          | 800                                                                                                             |
| Crystal size                    | 0.20 x 0.18 x 0.12 mm                                                                                           |
| Theta range for data collection | 3.25 to 27.49 deg.                                                                                              |
| Limiting indices                | -6<=h<=6, -13<=k<=12, -41<=l<=41                                                                                |
| Reflections collected / unique  | 16927 / 3804 [R(int) = 0.0424]                                                                                  |
| Completeness to theta = 27.49   | 99.8 %                                                                                                          |

|                                      |                                       |
|--------------------------------------|---------------------------------------|
| Absorption correction                | Semi-empirical from equivalents       |
| Max. and min. transmission           | 0.7443 and 0.6228                     |
| Refinement method                    | Full-matrix least-squares on $F^2$    |
| Data / restraints / parameters       | 3804 / 1 / 207                        |
| Goodness-of-fit on $F^2$             | 1.024                                 |
| Final R indices [ $I > 2\sigma(I)$ ] | $R_1 = 0.0186$ , $wR_2 = 0.0443$      |
| R indices (all data)                 | $R_1 = 0.0198$ , $wR_2 = 0.0444$      |
| Absolute structure parameter         | 0.007(5)                              |
| Largest diff. peak and hole          | 0.264 and -0.621 e. $\text{\AA}^{-3}$ |

# NMR Spectra ( $^1\text{H}$ NMR, $^{13}\text{C}$ NMR)

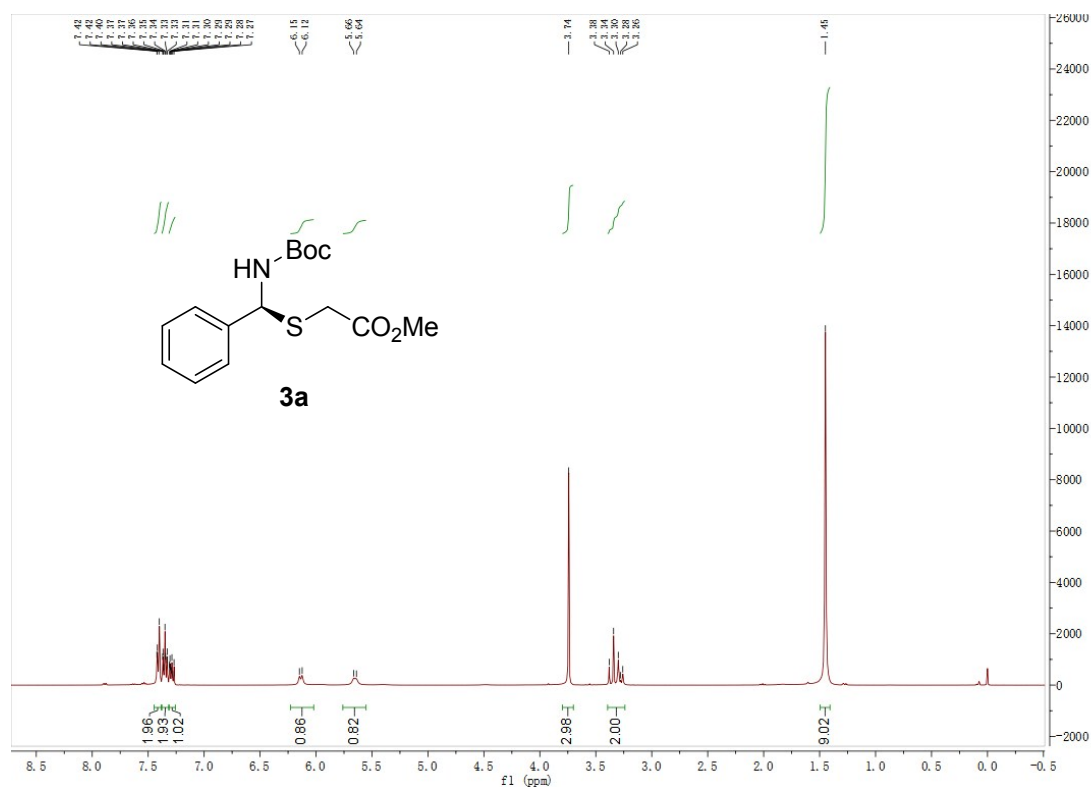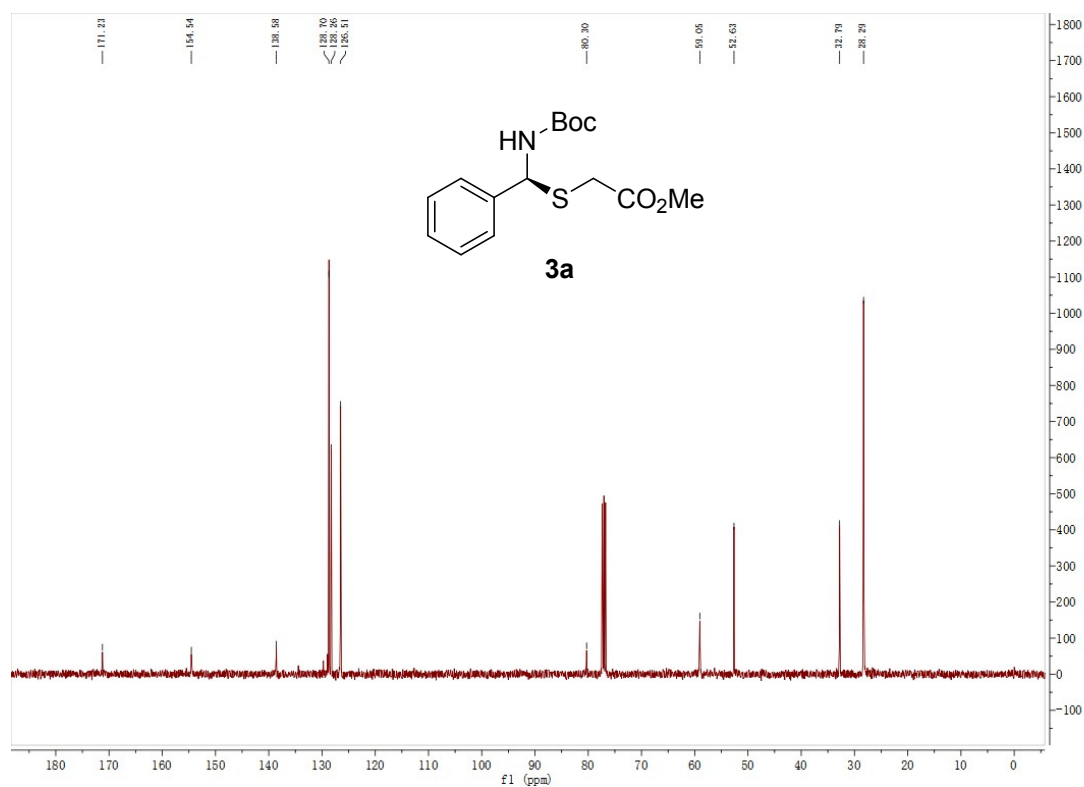

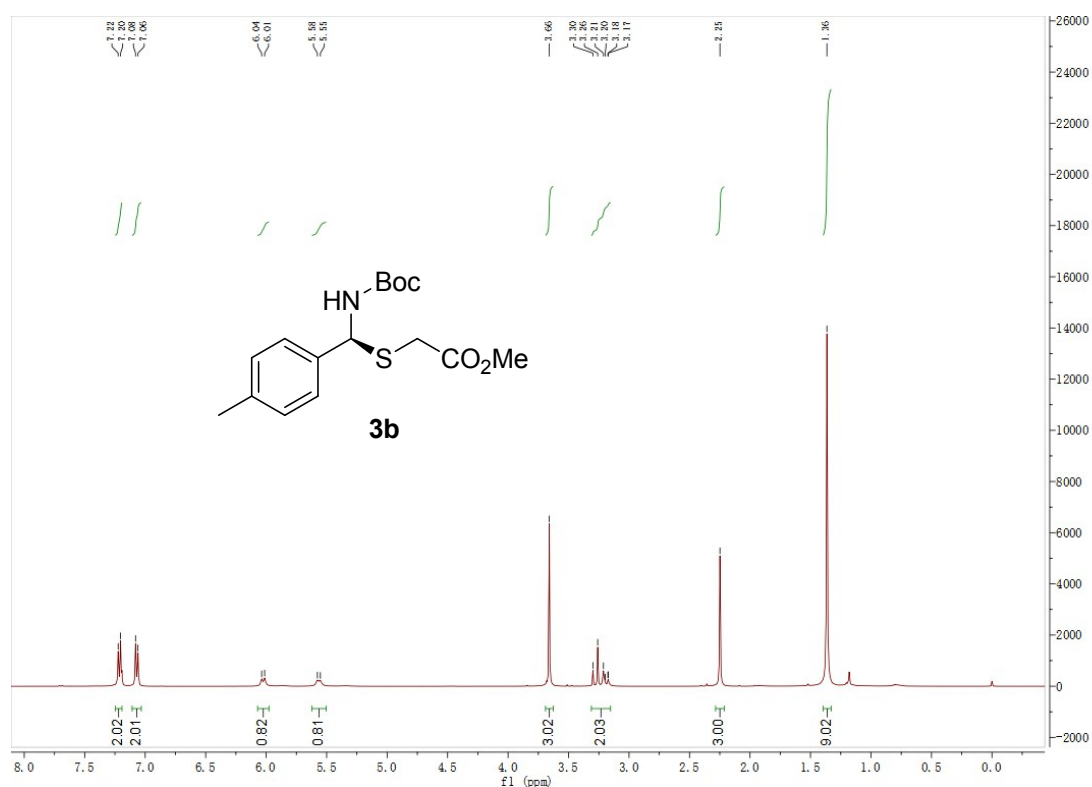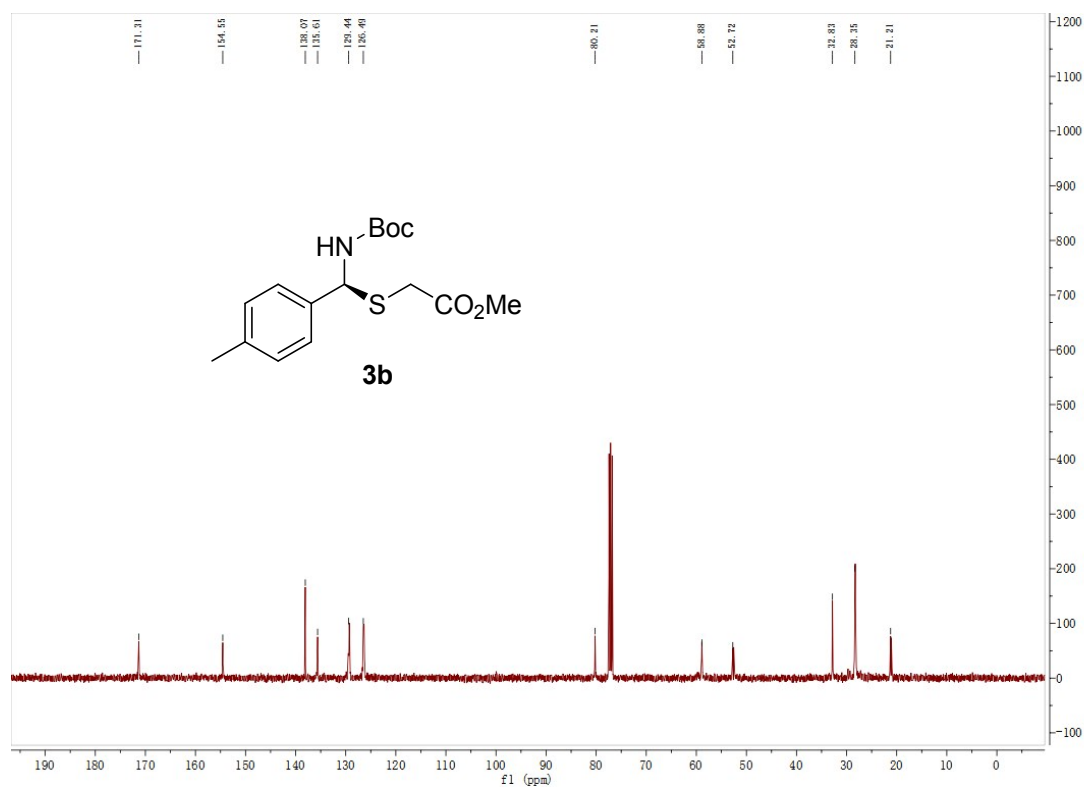

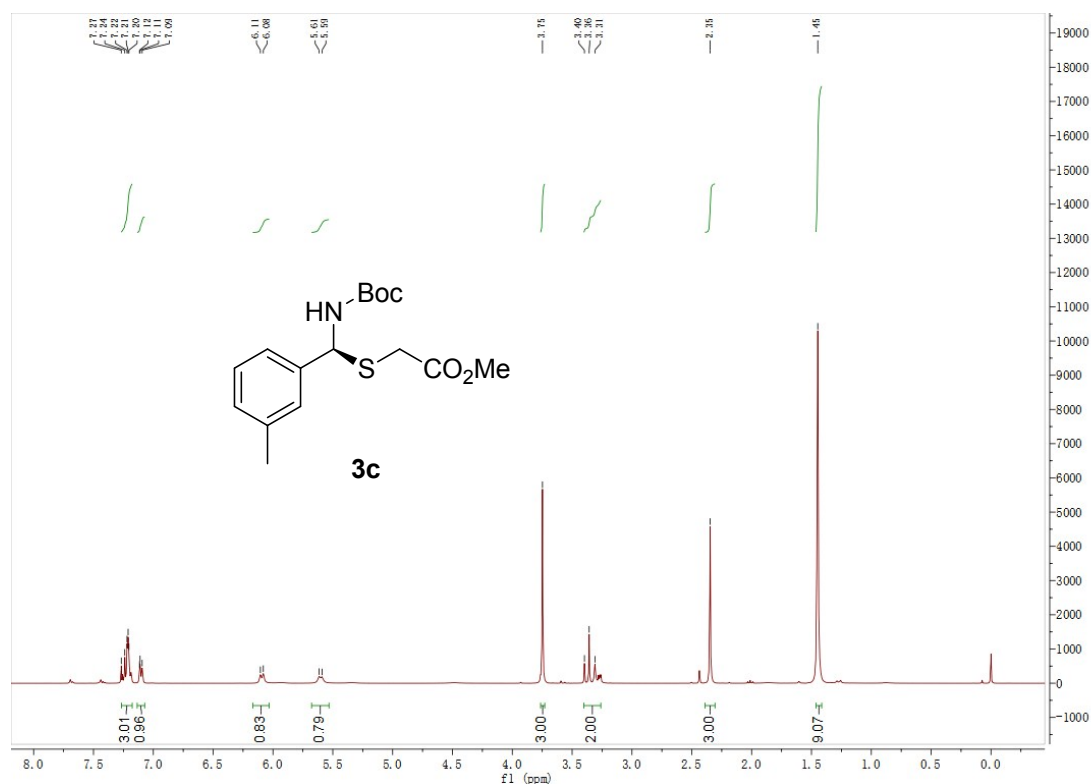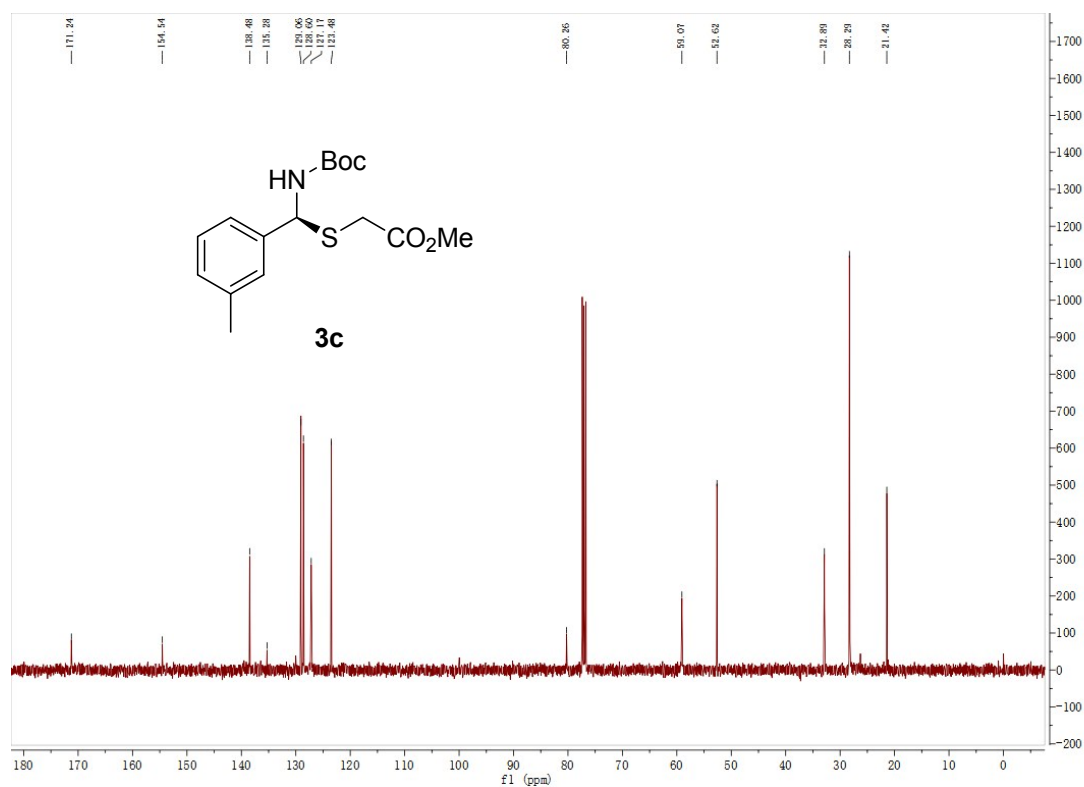

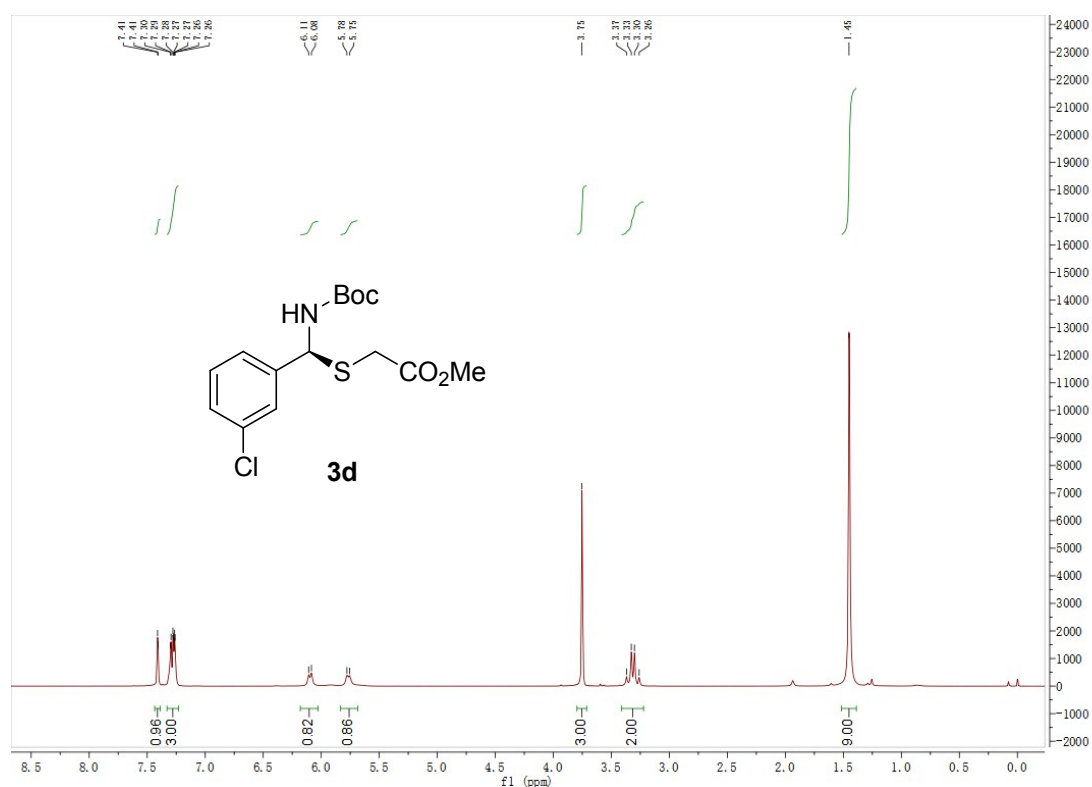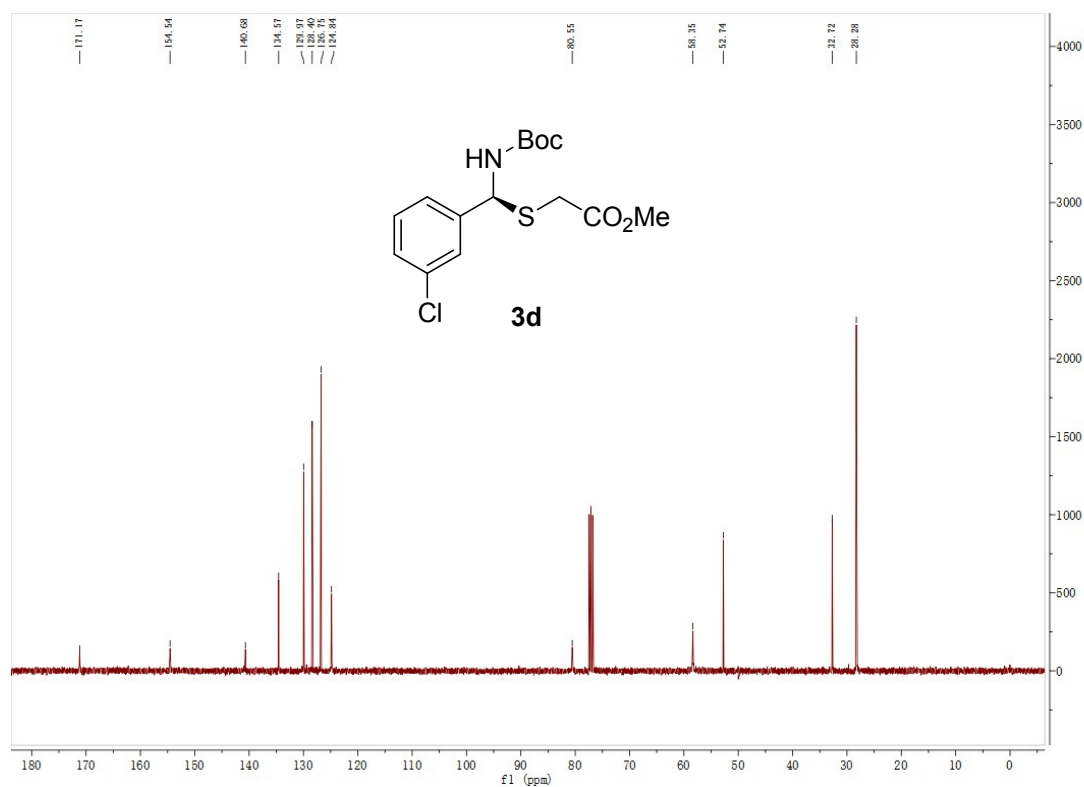

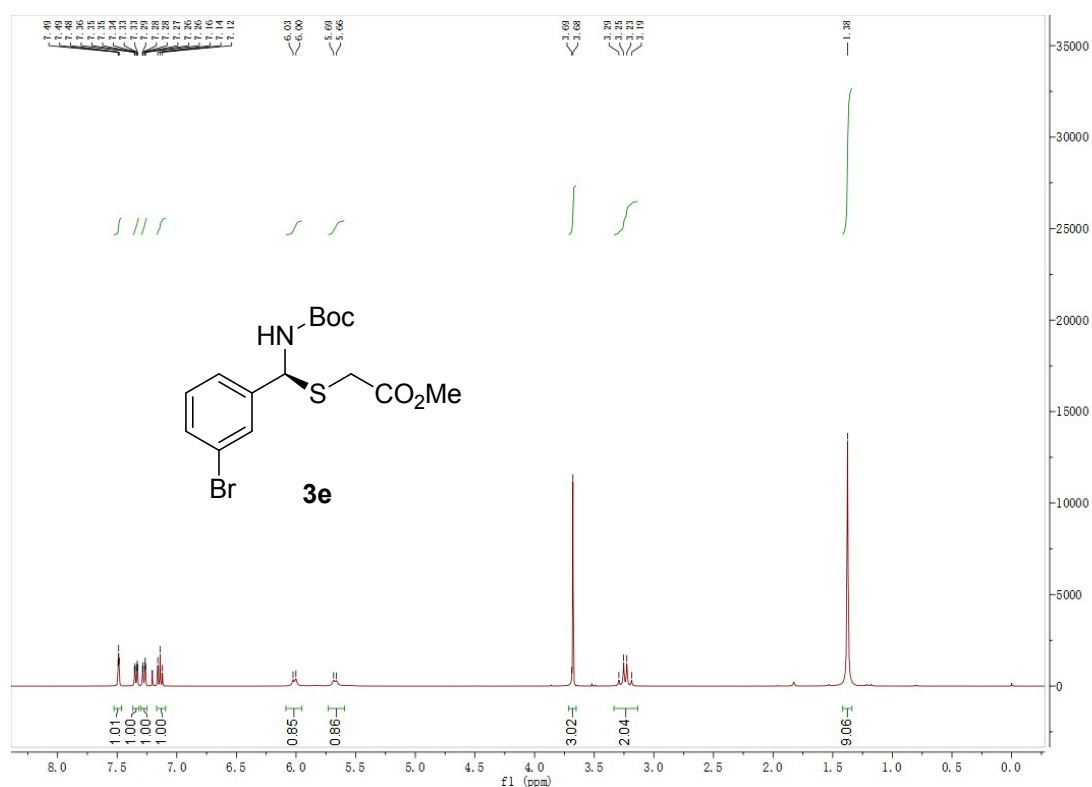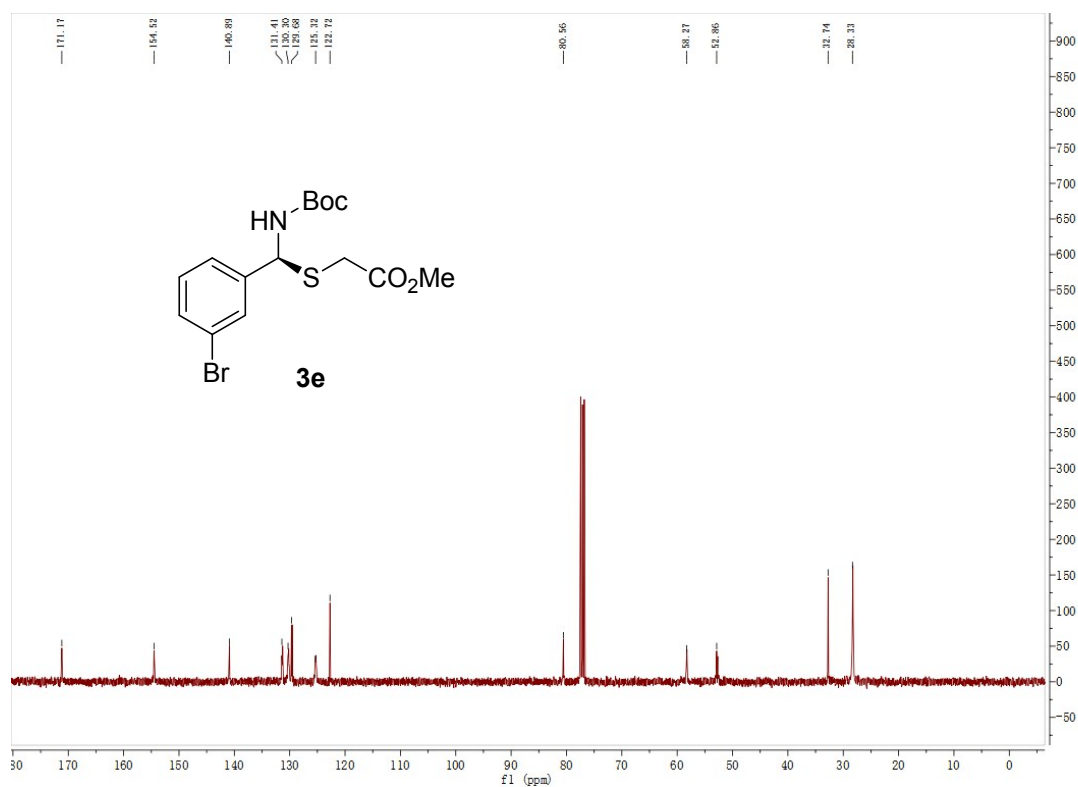



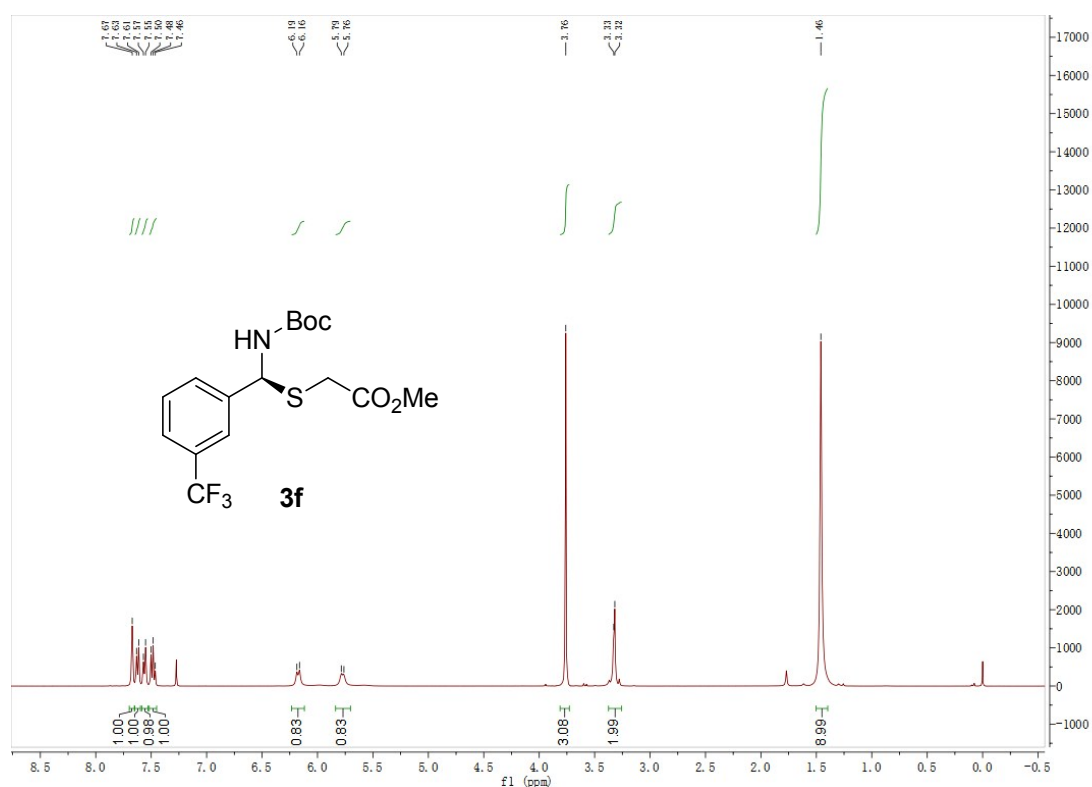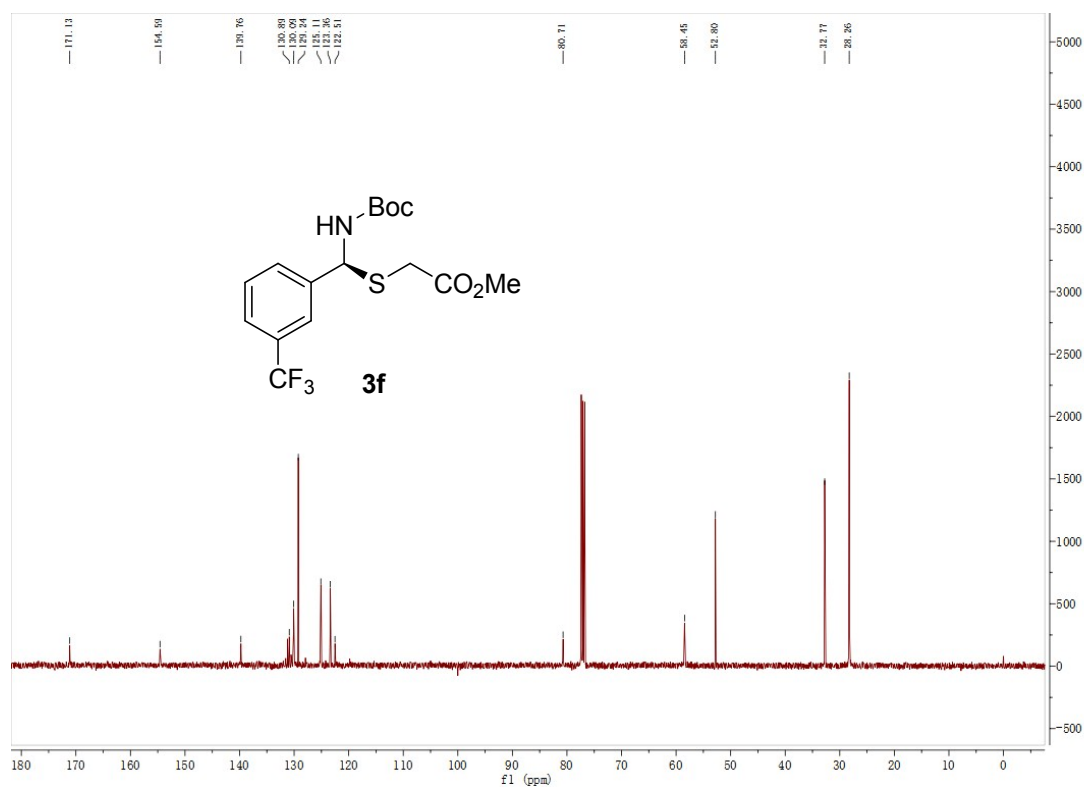

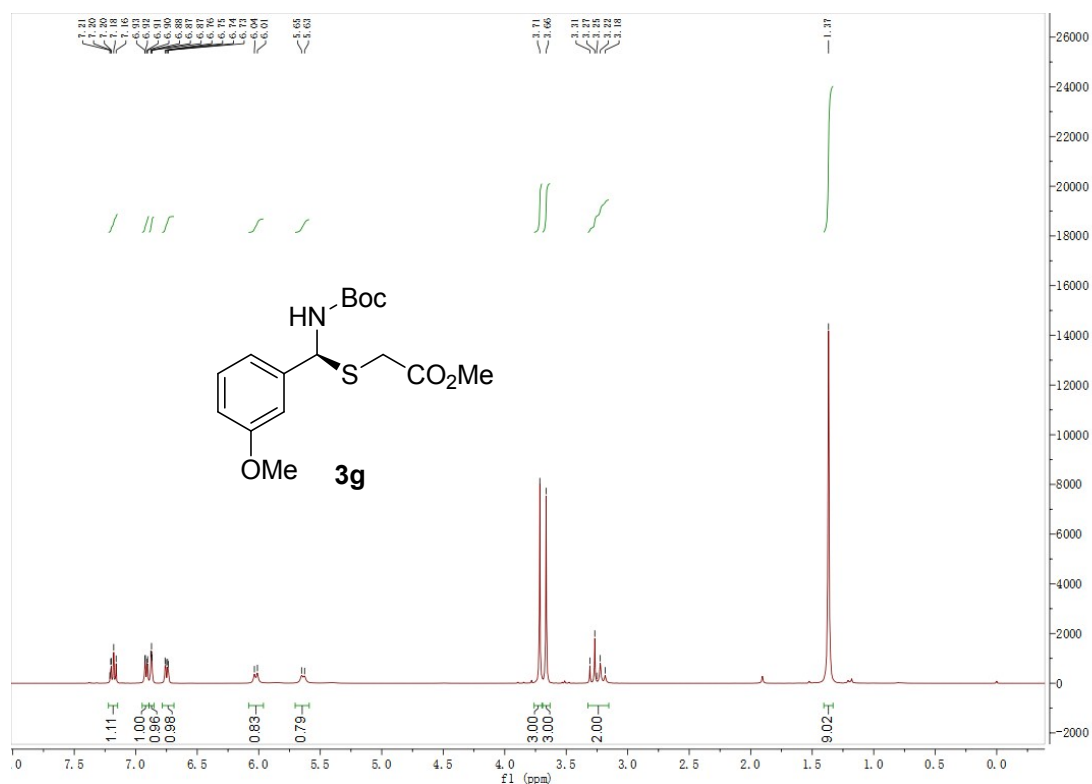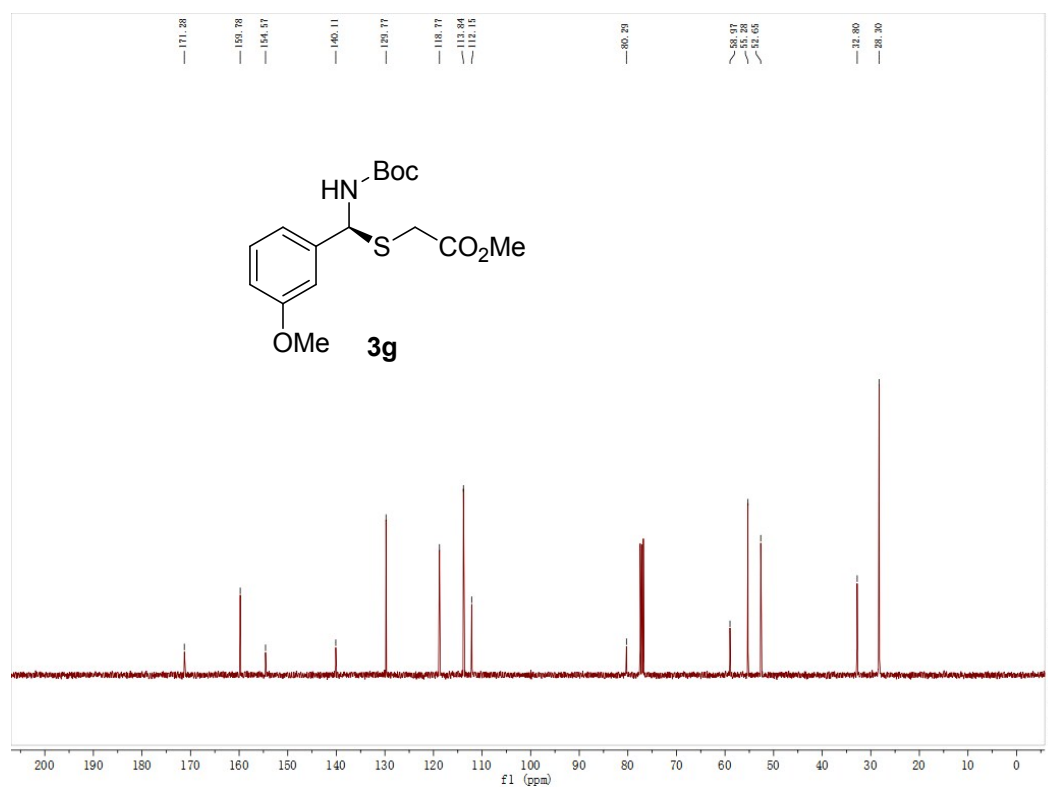

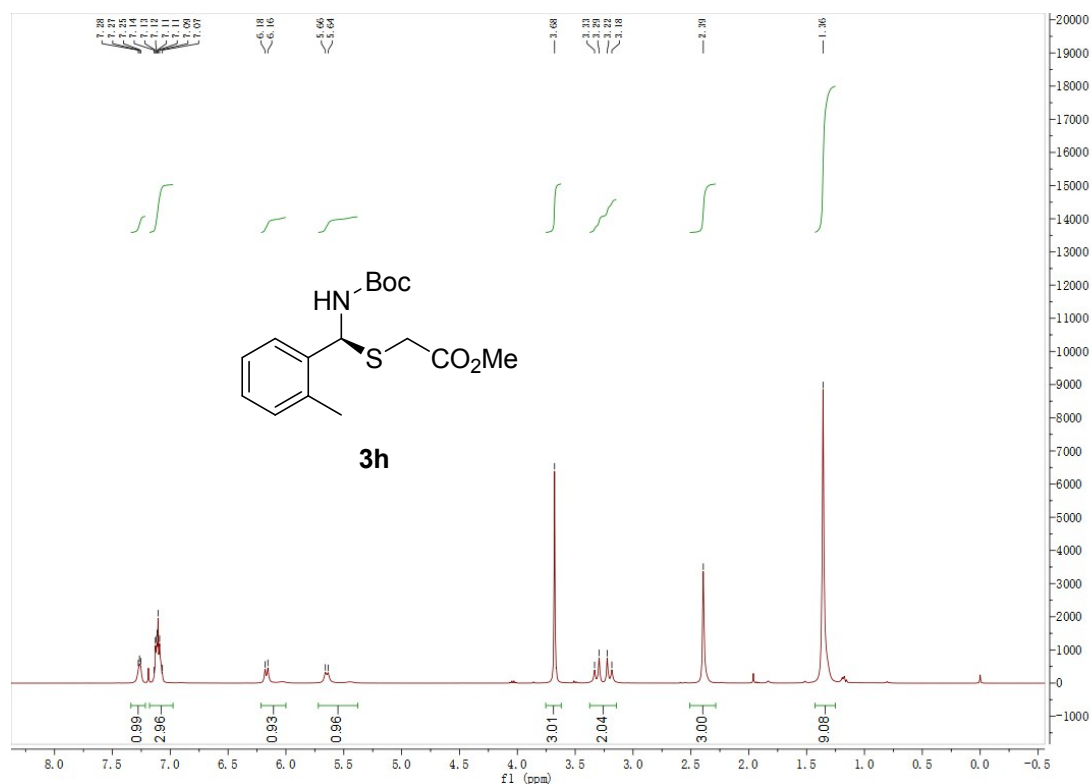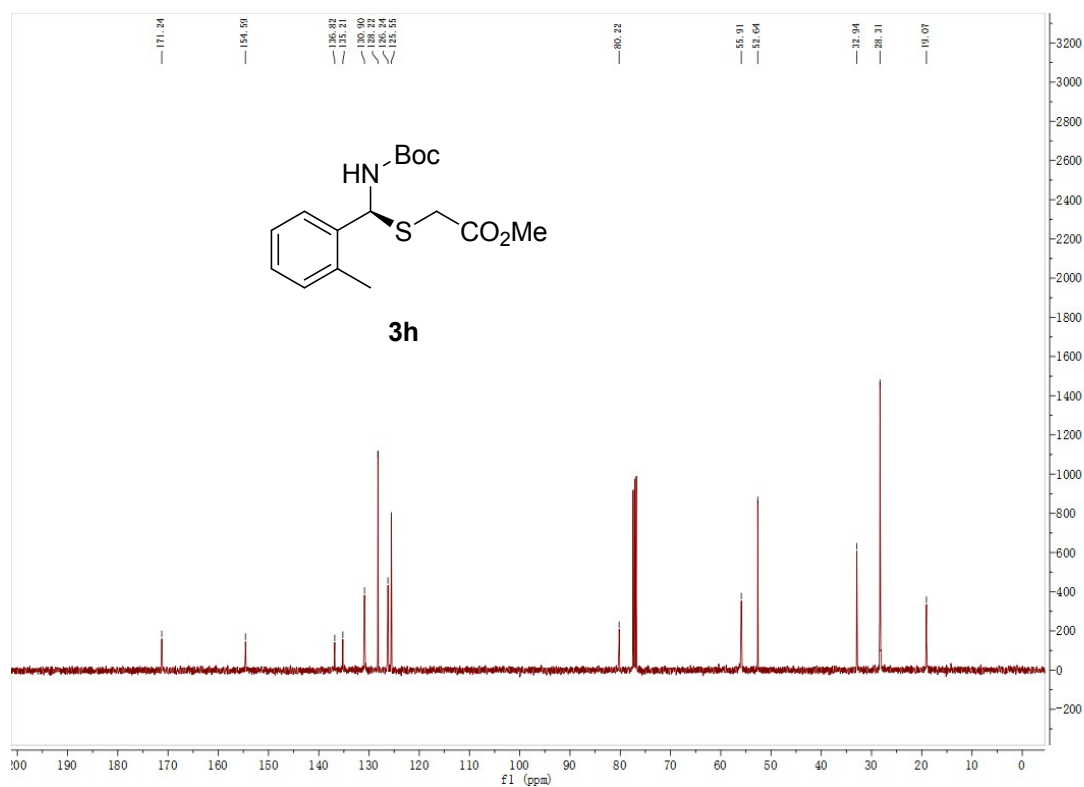

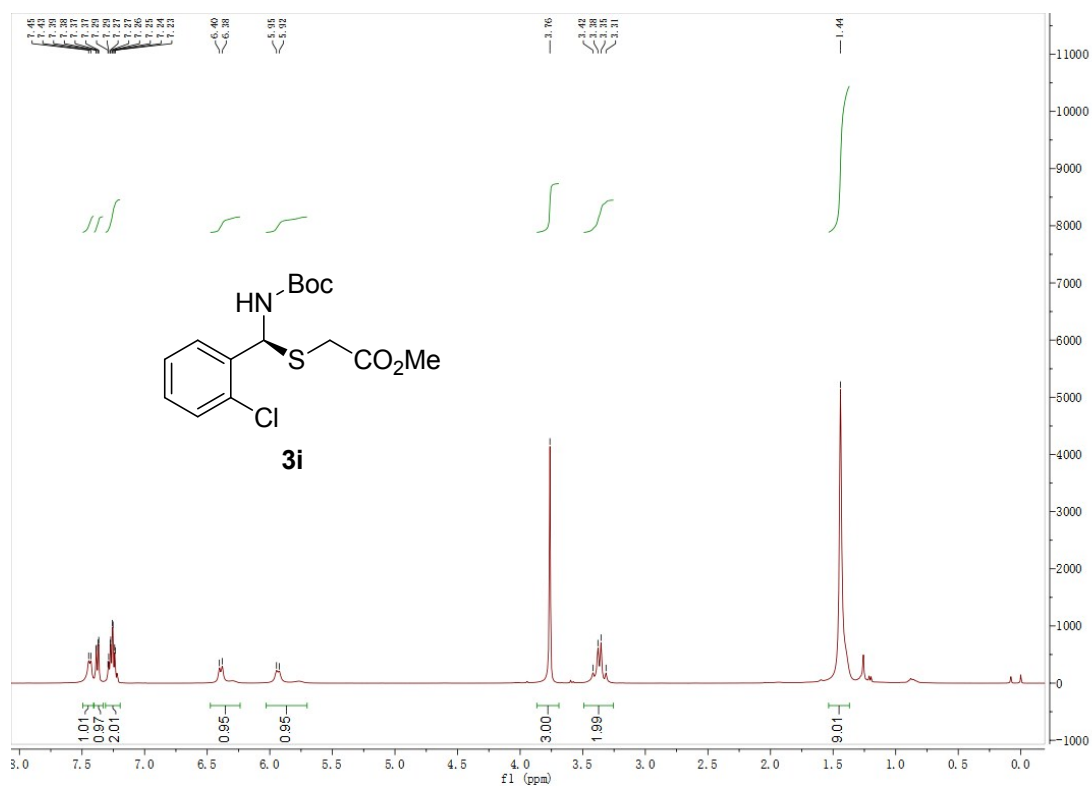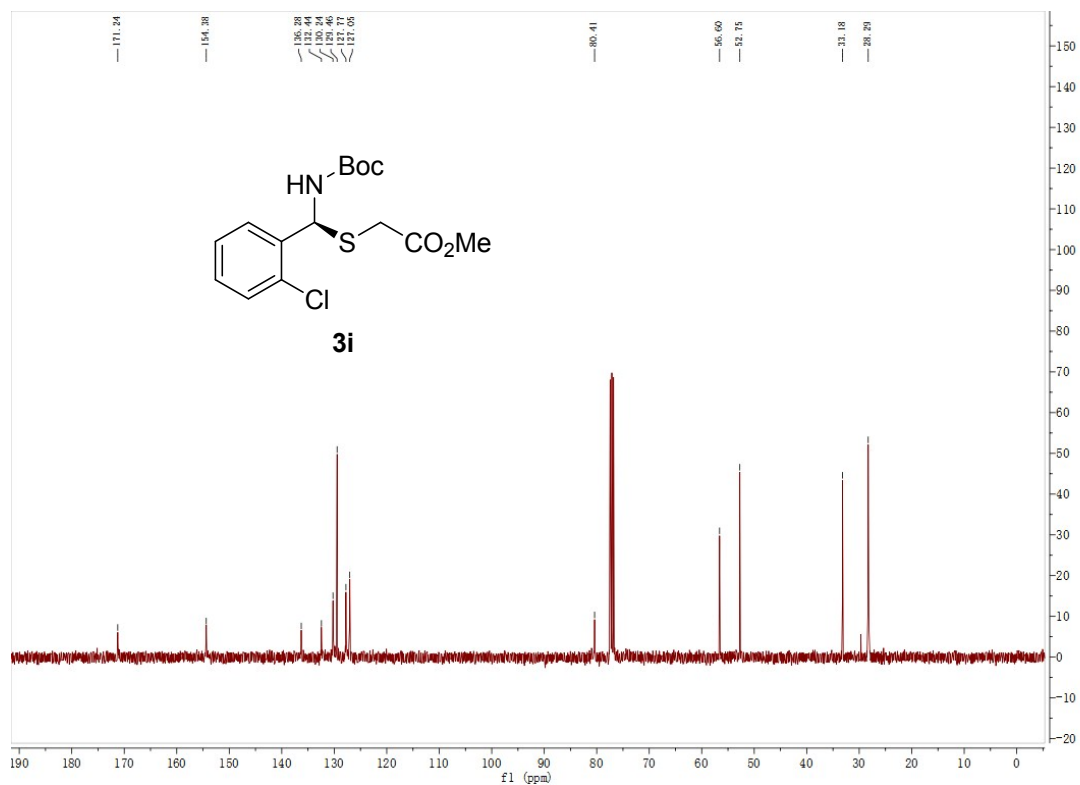

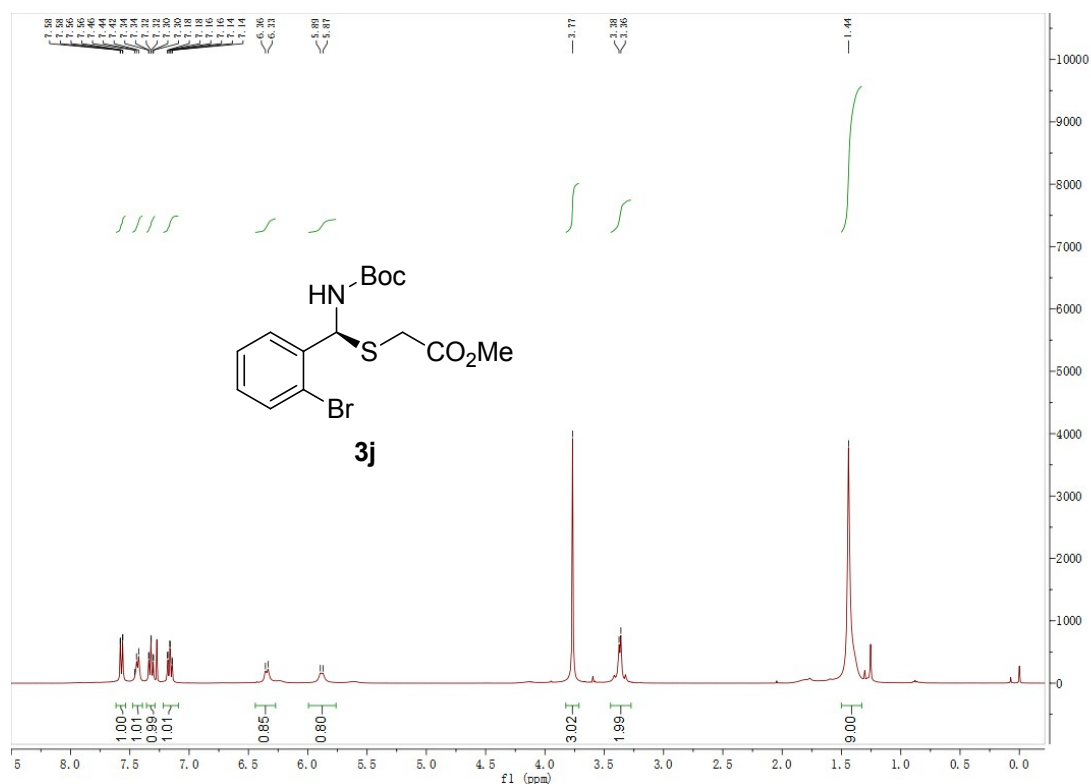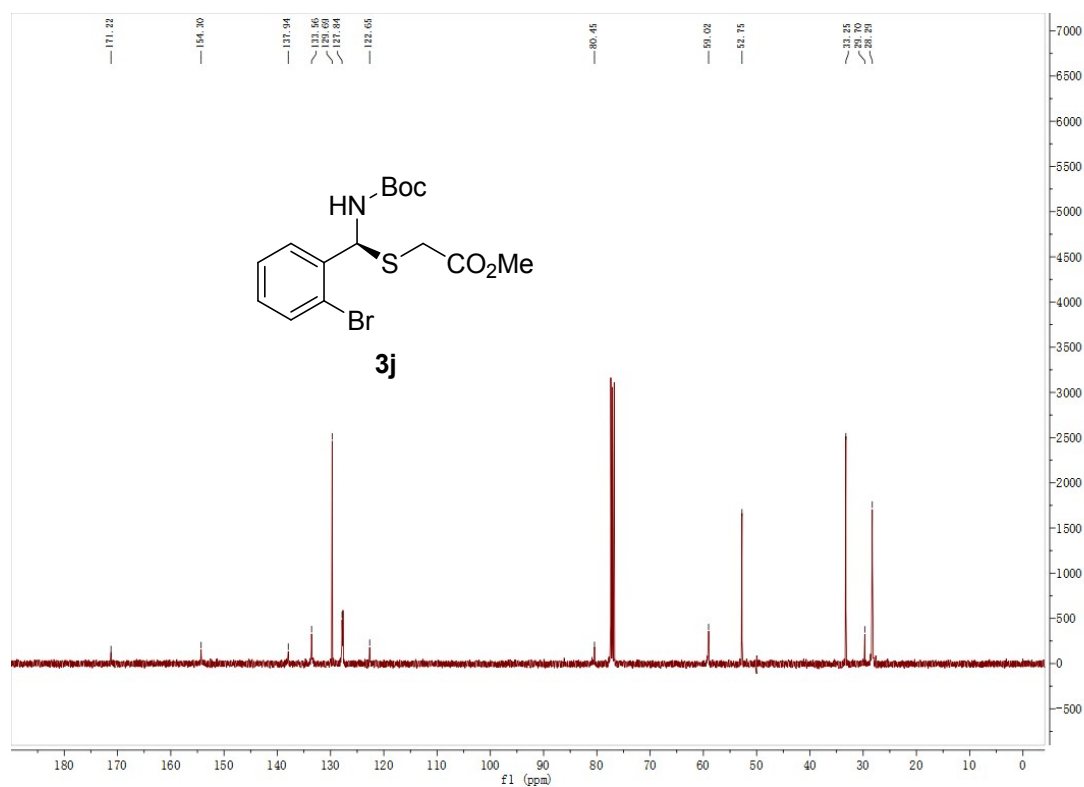

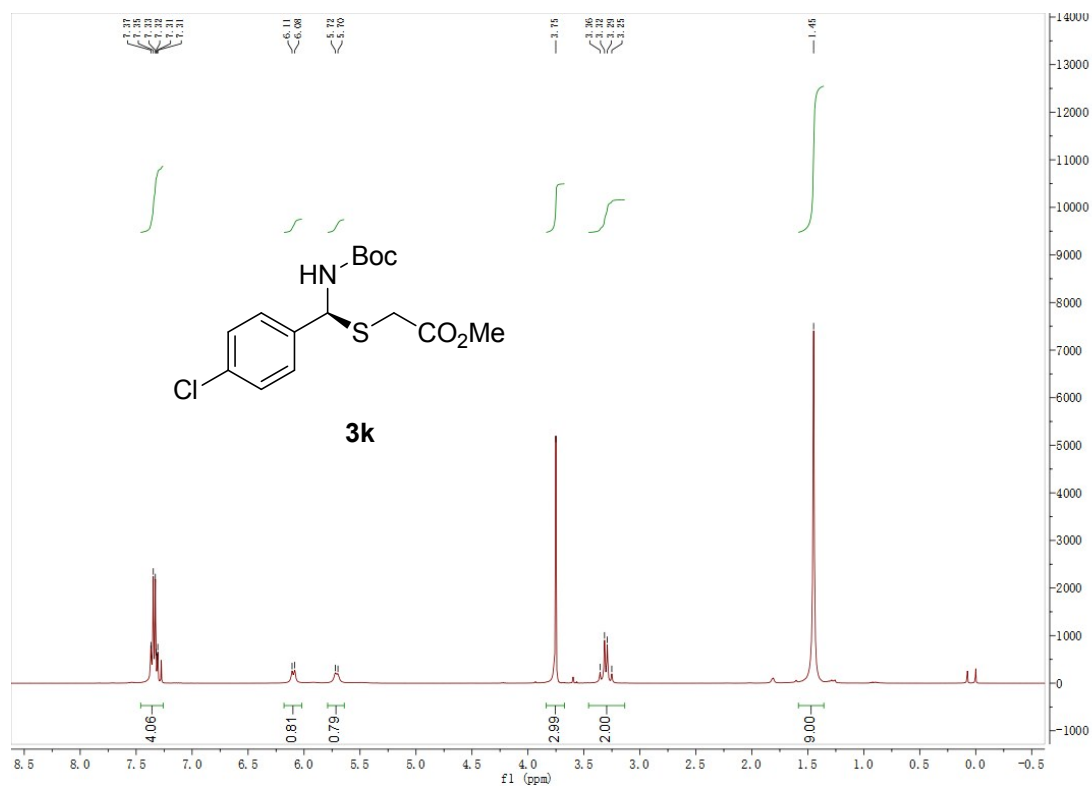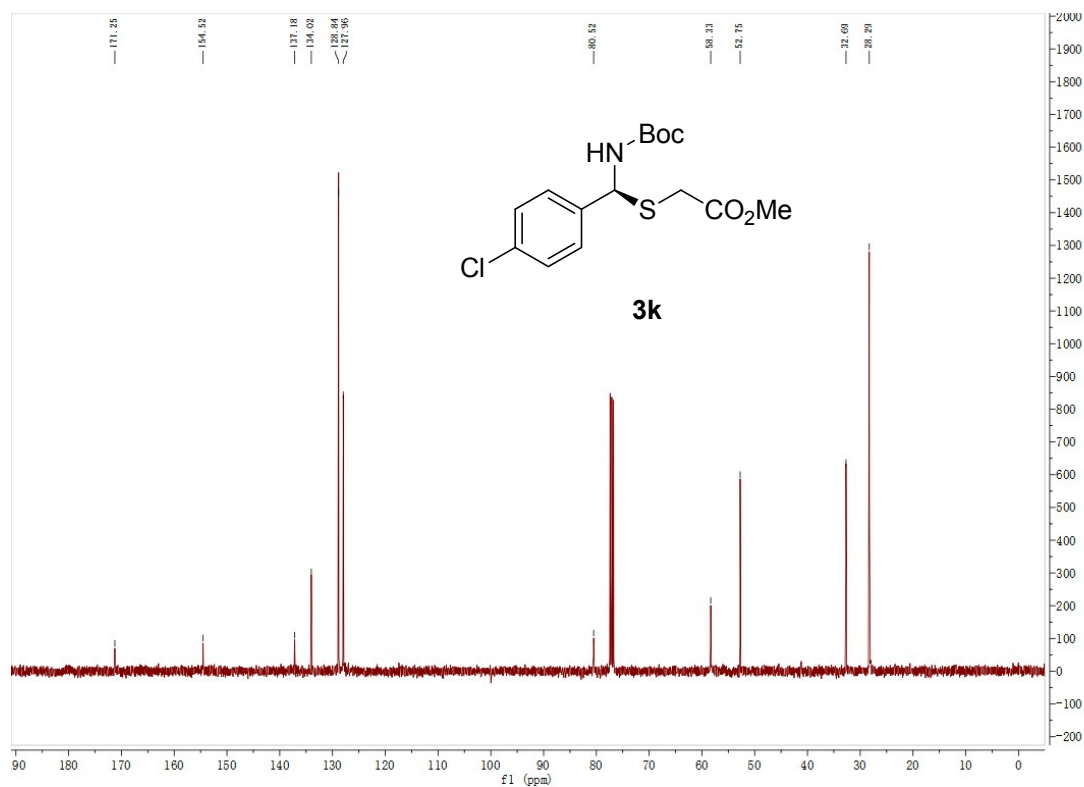

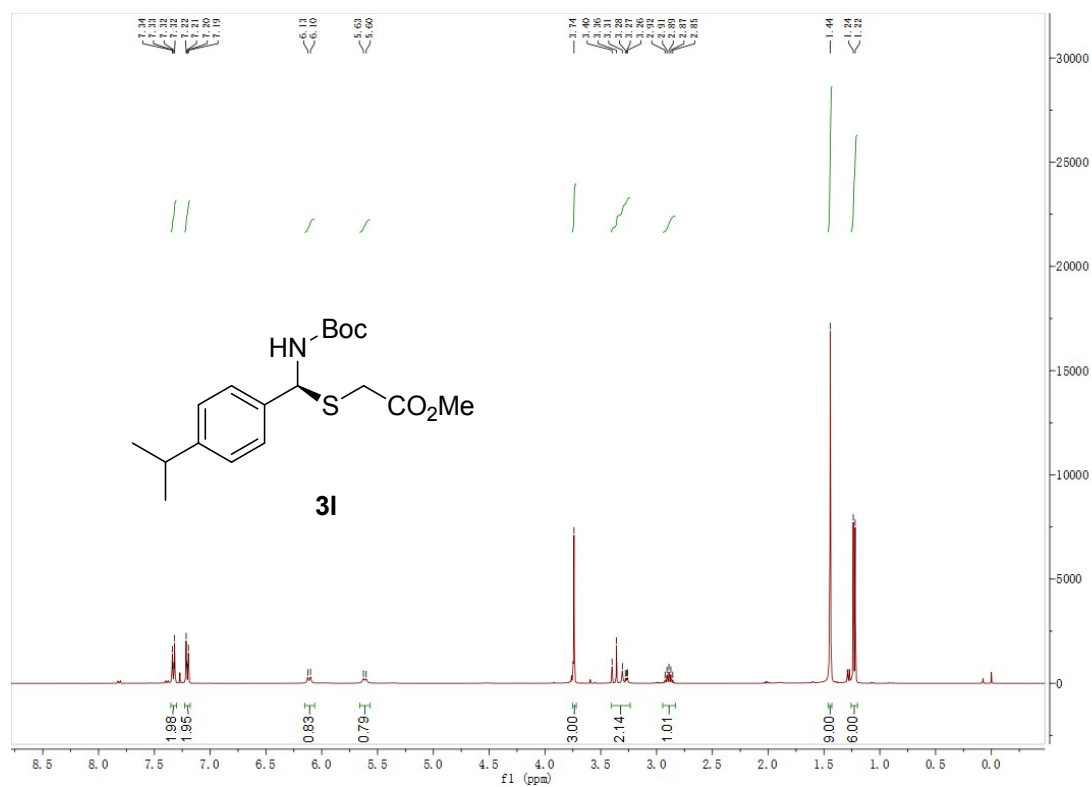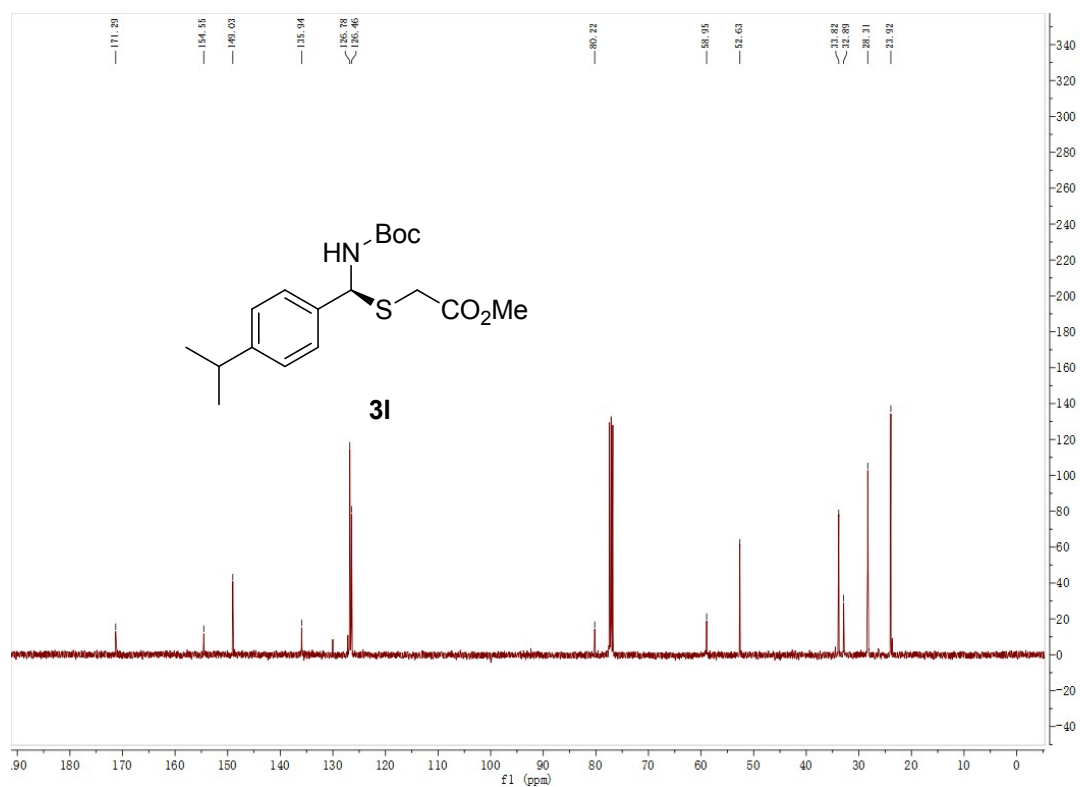

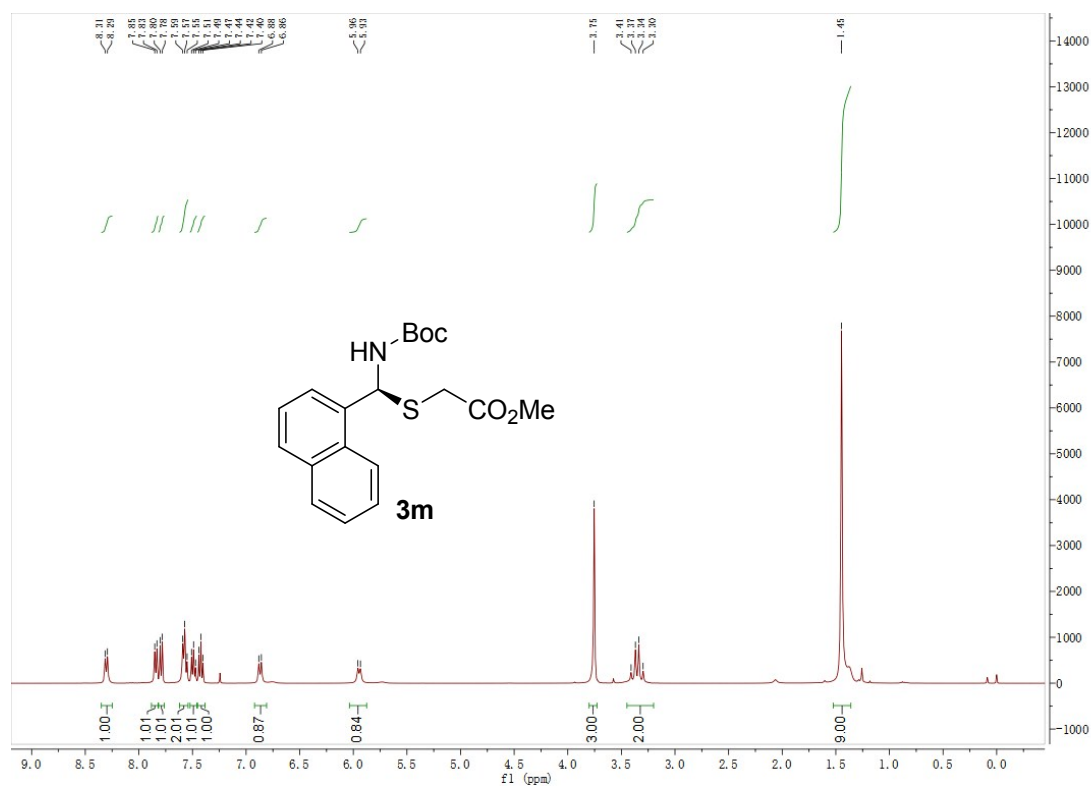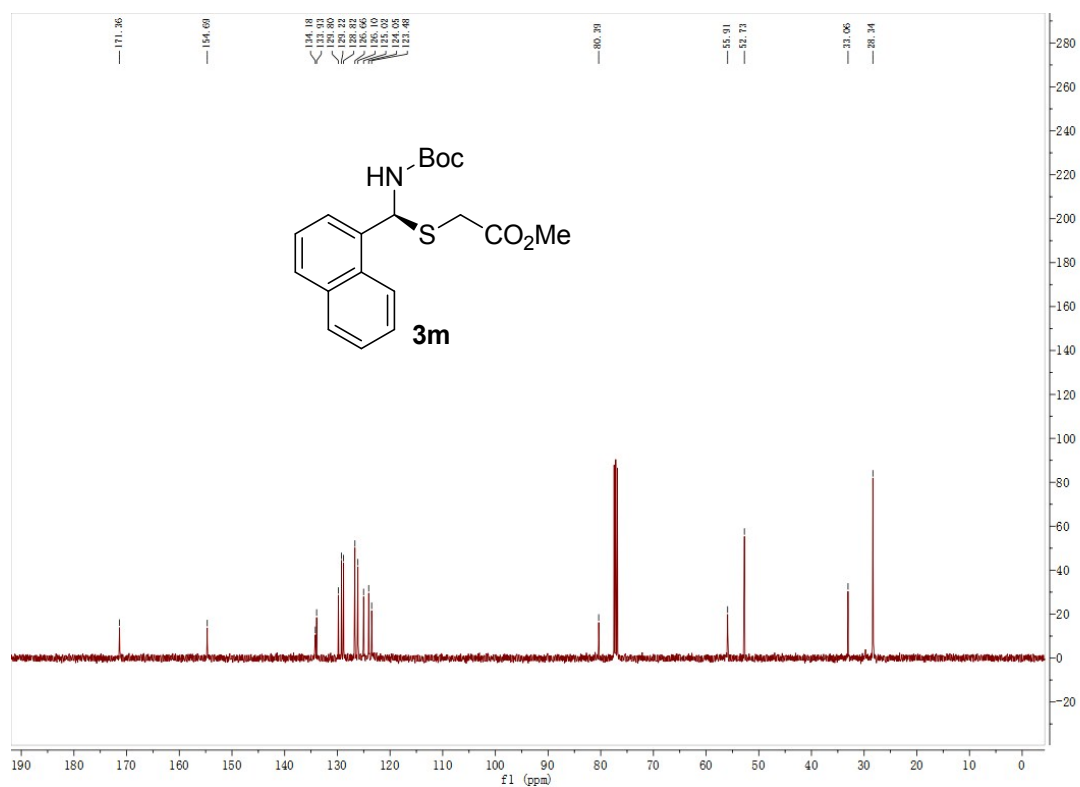



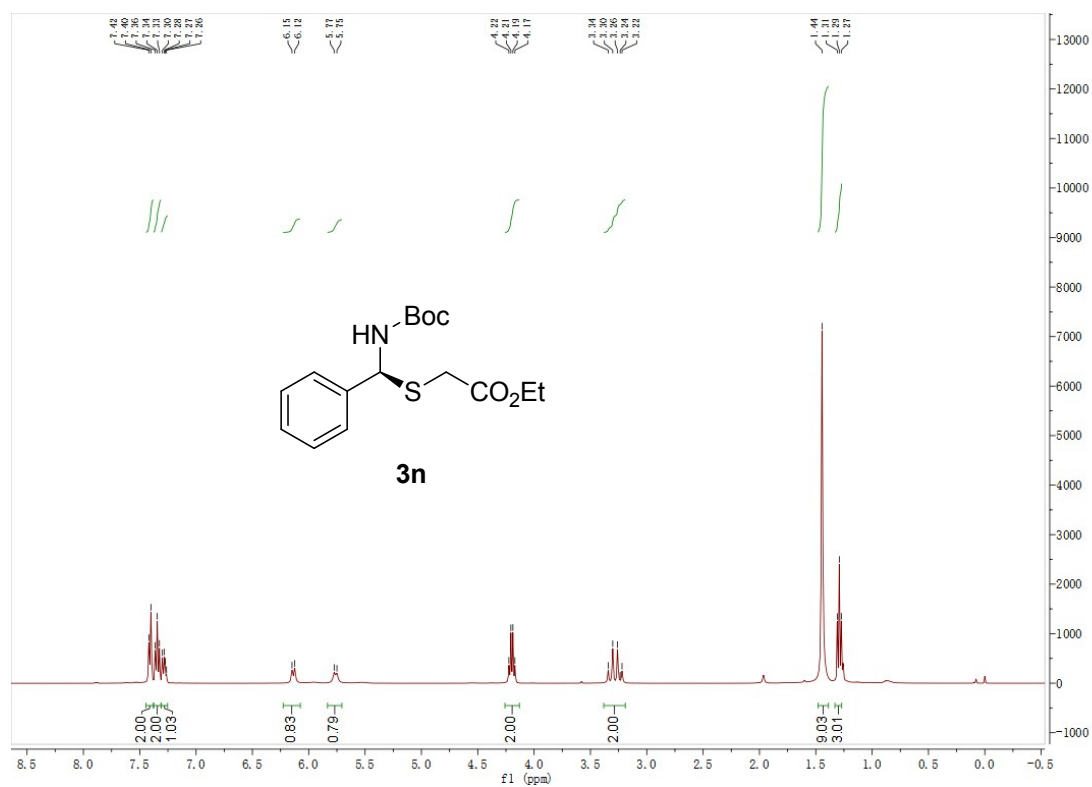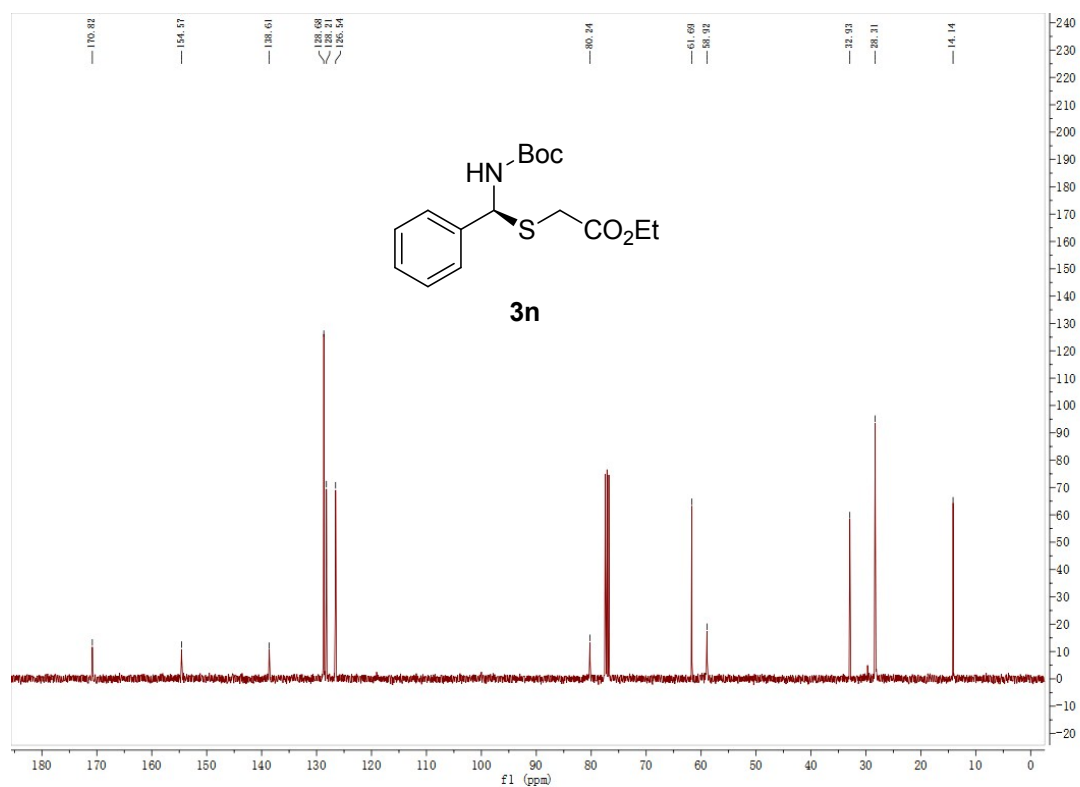

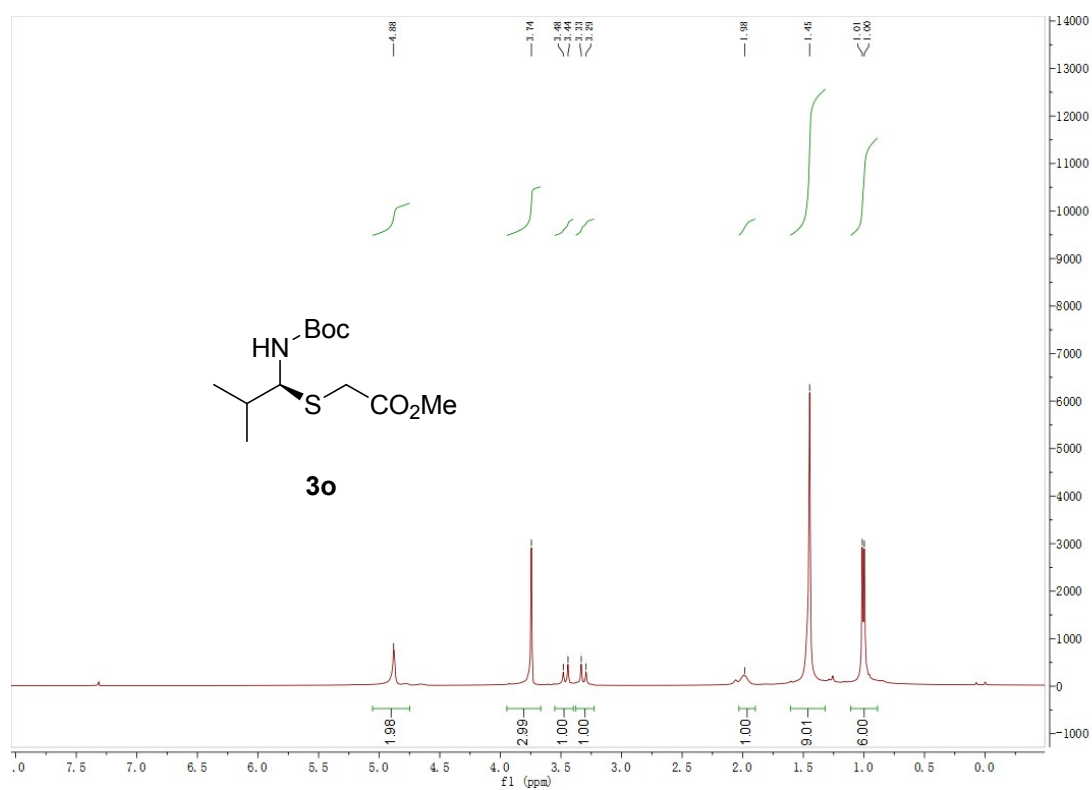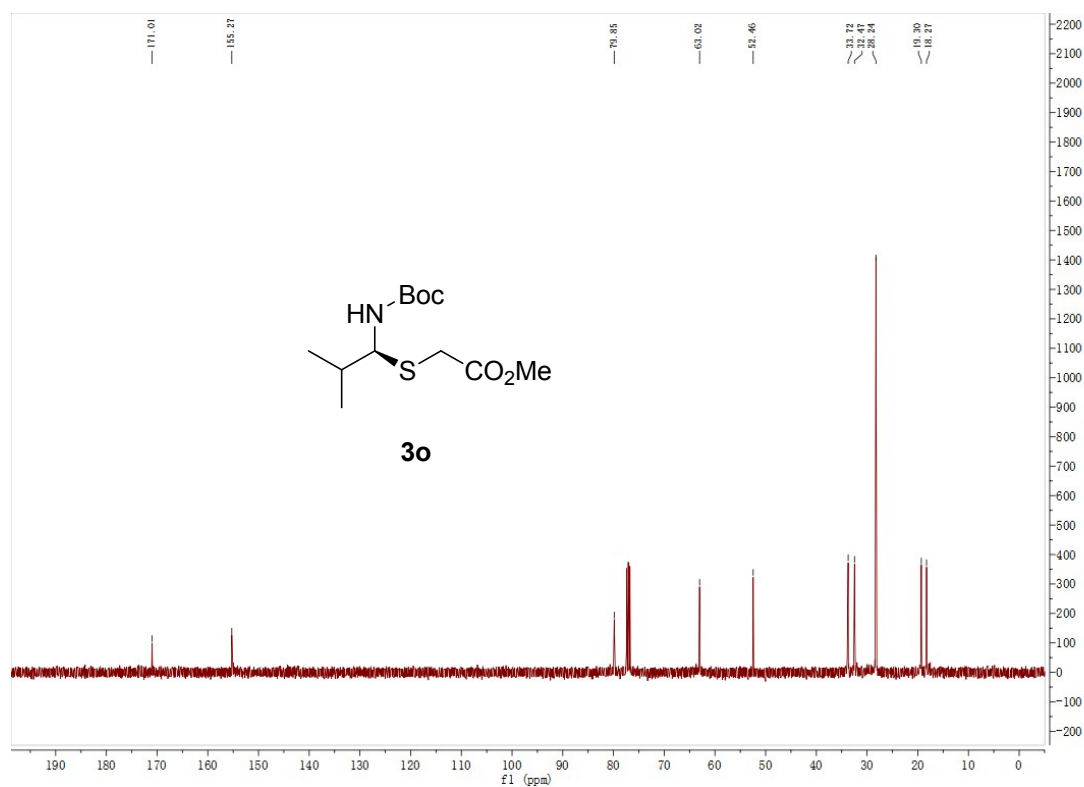

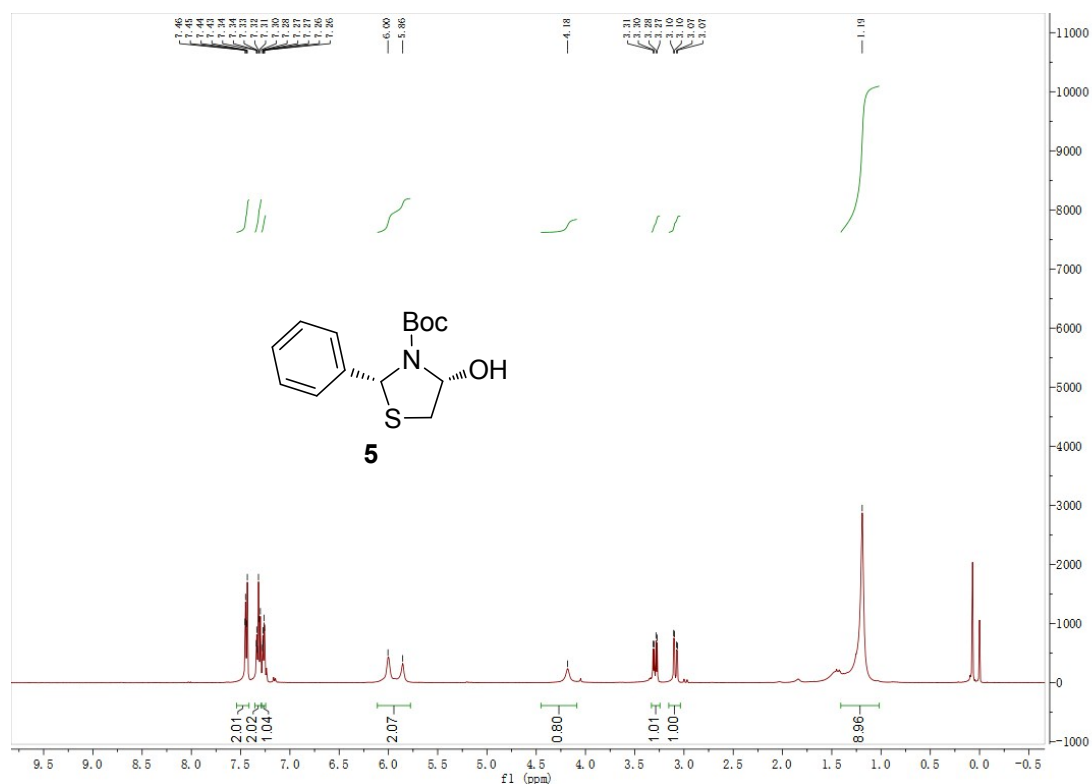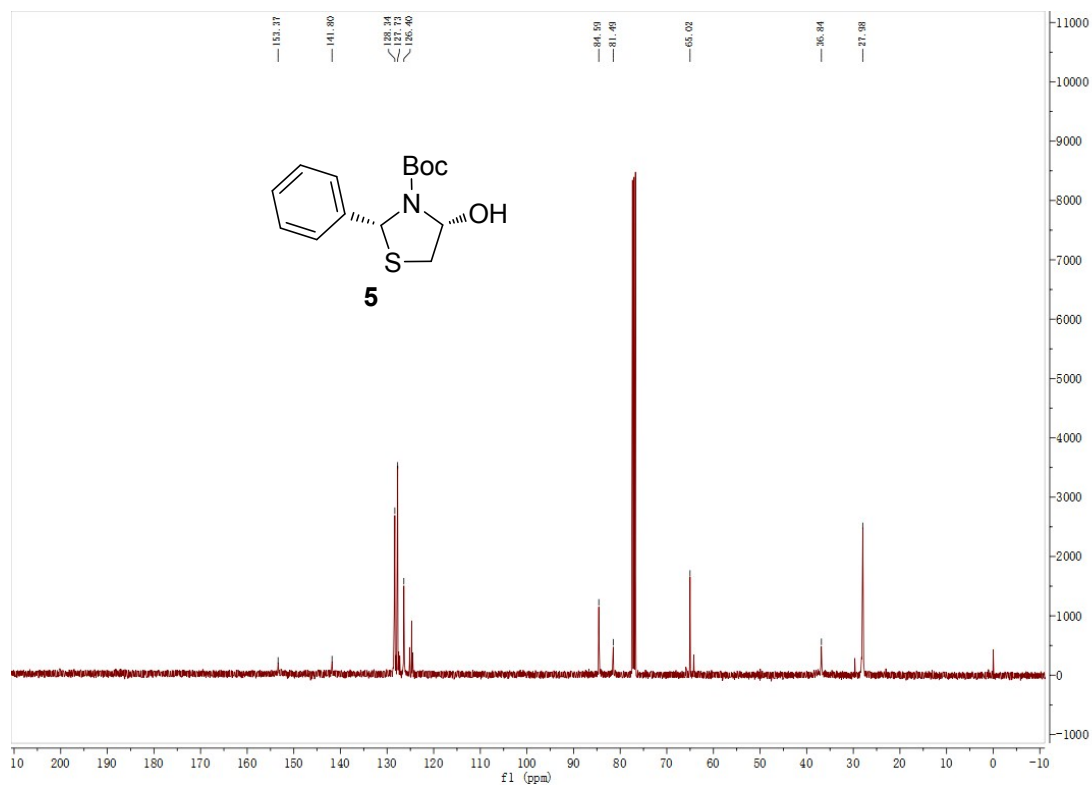

# HPLC Spectrum

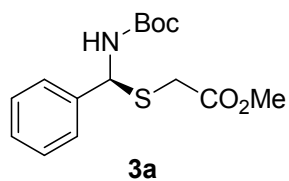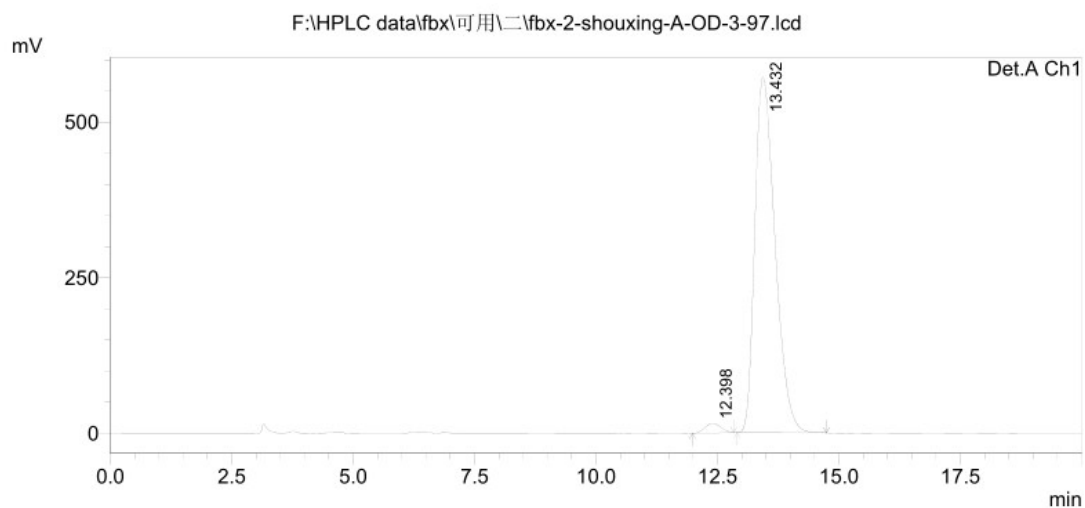

PeakTable

| Peak# | Ret. Time | Area     | Height | Area %  | Height % |
|-------|-----------|----------|--------|---------|----------|
| 1     | 12.398    | 358940   | 15596  | 2.120   | 2.657    |
| 2     | 13.432    | 16572879 | 571360 | 97.880  | 97.343   |
| Total |           | 16931818 | 586957 | 100.000 | 100.000  |

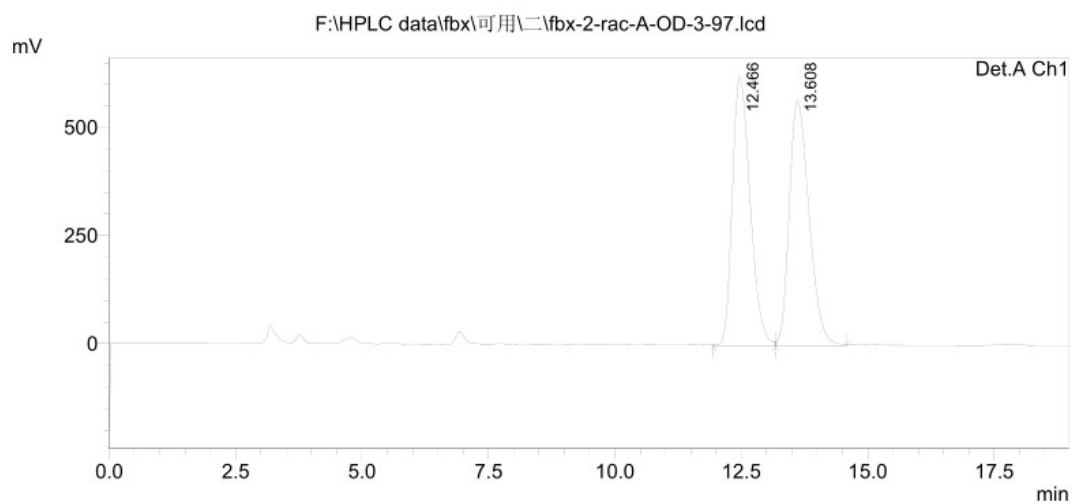

PeakTable

| Peak# | Ret. Time | Area     | Height  | Area %  | Height % |
|-------|-----------|----------|---------|---------|----------|
| 1     | 12.466    | 15159157 | 620136  | 49.705  | 52.282   |
| 2     | 13.608    | 15338844 | 566003  | 50.295  | 47.718   |
| Total |           | 30498001 | 1186140 | 100.000 | 100.000  |

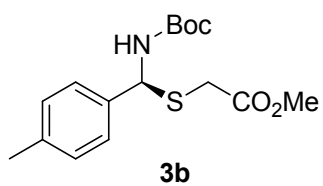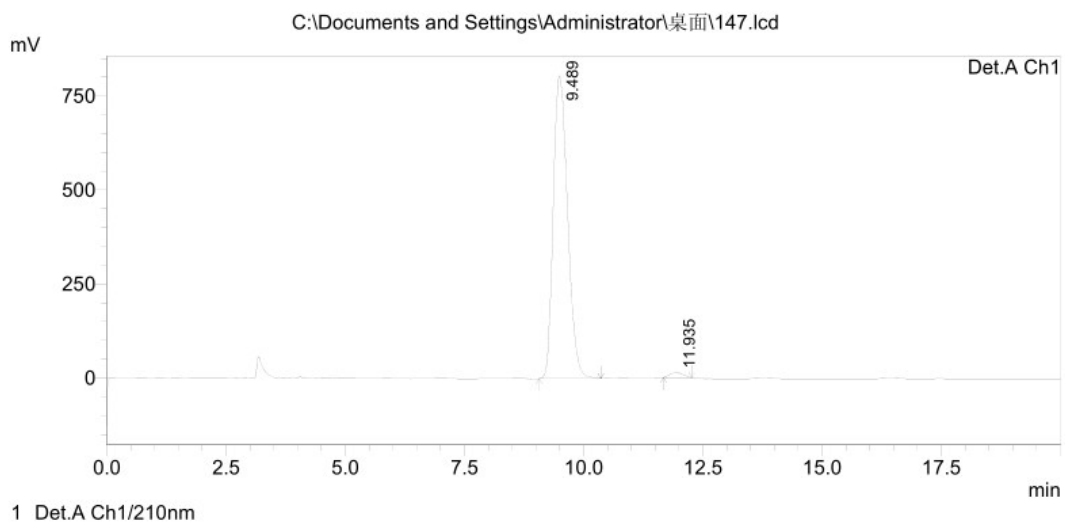

PeakTable

| Peak# | Ret. Time | Area     | Height | Area %  | Height % |
|-------|-----------|----------|--------|---------|----------|
| 1     | 9.489     | 16873514 | 806390 | 98.554  | 98.450   |
| 2     | 11.935    | 247594   | 12697  | 1.446   | 1.550    |
| Total |           | 17121108 | 819088 | 100.000 | 100.000  |

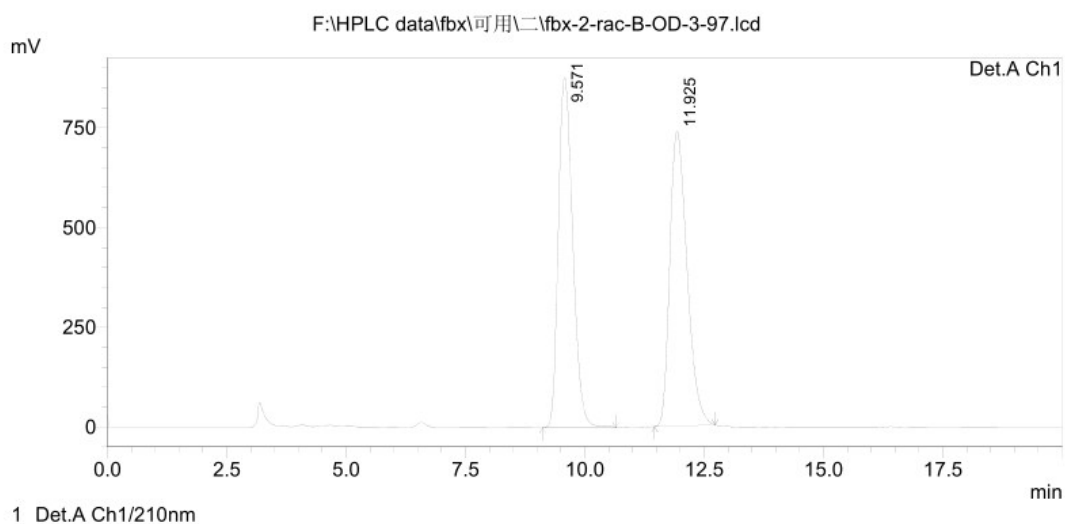

PeakTable

| Peak# | Ret. Time | Area     | Height  | Area %  | Height % |
|-------|-----------|----------|---------|---------|----------|
| 1     | 9.571     | 18461390 | 878979  | 49.877  | 54.324   |
| 2     | 11.925    | 18552728 | 739065  | 50.123  | 45.676   |
| Total |           | 37014118 | 1618043 | 100.000 | 100.000  |

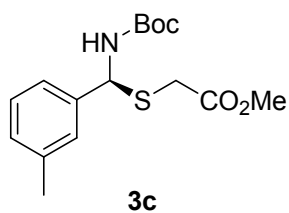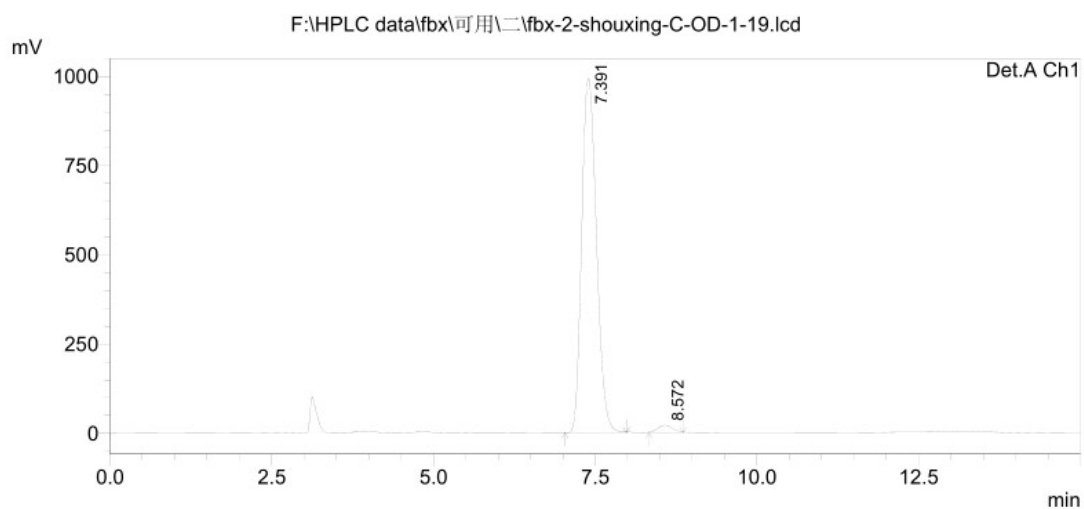

1 Det.A Ch1/210nm

| PeakTable |           |          |         |         |          |
|-----------|-----------|----------|---------|---------|----------|
| Peak#     | Ret. Time | Area     | Height  | Area %  | Height % |
| 1         | 7.391     | 15772184 | 992955  | 97.804  | 97.936   |
| 2         | 8.572     | 354146   | 20929   | 2.196   | 2.064    |
| Total     |           | 16126330 | 1013884 | 100.000 | 100.000  |

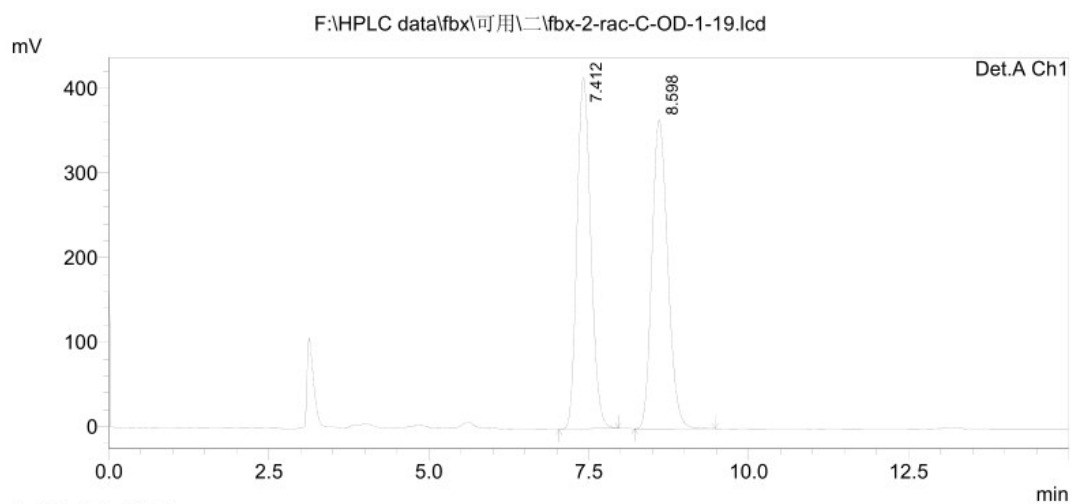

1 Det.A Ch1/210nm

| PeakTable |           |          |        |         |          |
|-----------|-----------|----------|--------|---------|----------|
| Peak#     | Ret. Time | Area     | Height | Area %  | Height % |
| 1         | 7.412     | 6242313  | 415950 | 49.868  | 53.239   |
| 2         | 8.598     | 6275242  | 365340 | 50.132  | 46.761   |
| Total     |           | 12517555 | 781290 | 100.000 | 100.000  |

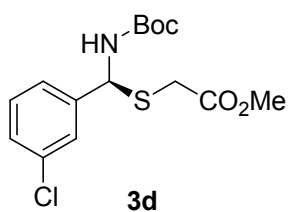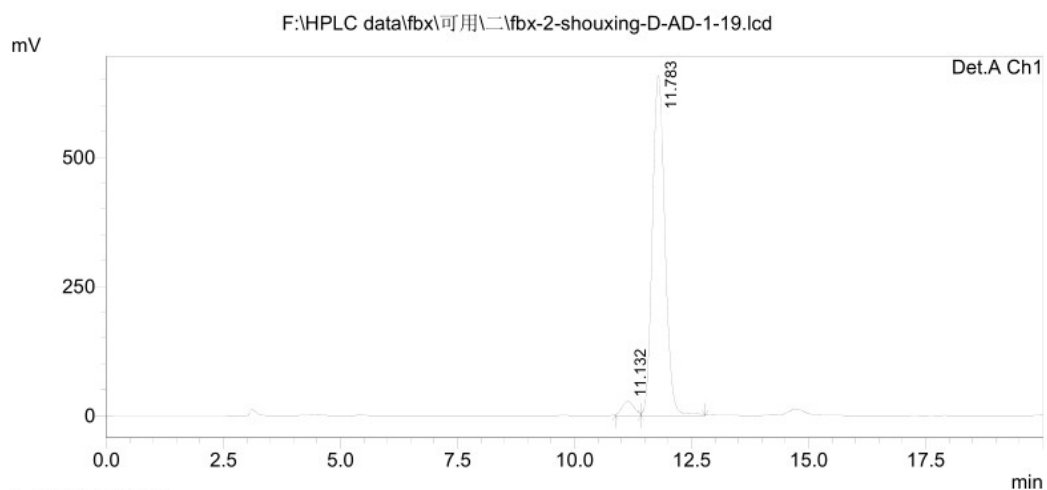

| PeakTable            |           |          |        |         |          |
|----------------------|-----------|----------|--------|---------|----------|
| Detector A Ch1 220nm |           |          |        |         |          |
| Peak#                | Ret. Time | Area     | Height | Area %  | Height % |
| 1                    | 11.132    | 494796   | 27280  | 3.882   | 3.980    |
| 2                    | 11.783    | 12250737 | 658221 | 96.118  | 96.020   |
| Total                |           | 12745533 | 685501 | 100.000 | 100.000  |

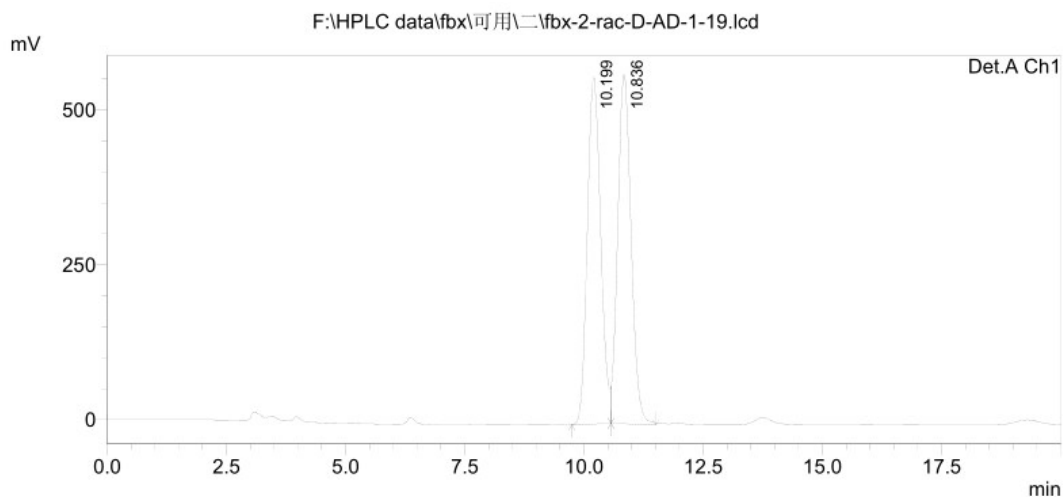

| PeakTable            |           |          |         |         |          |
|----------------------|-----------|----------|---------|---------|----------|
| Detector A Ch1 220nm |           |          |         |         |          |
| Peak#                | Ret. Time | Area     | Height  | Area %  | Height % |
| 1                    | 10.199    | 10954622 | 559384  | 49.868  | 49.824   |
| 2                    | 10.836    | 11012692 | 563338  | 50.132  | 50.176   |
| Total                |           | 21967314 | 1122722 | 100.000 | 100.000  |

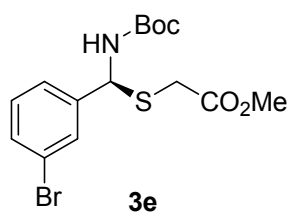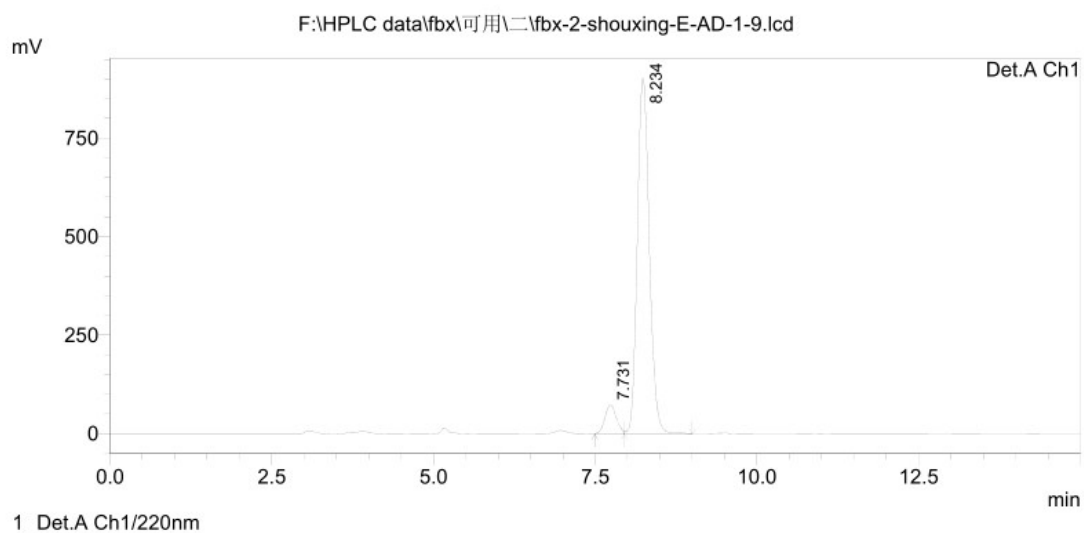

PeakTable

| Peak# | Ret. Time | Area     | Height | Area %  | Height % |
|-------|-----------|----------|--------|---------|----------|
| 1     | 7.731     | 933782   | 74500  | 7.393   | 7.619    |
| 2     | 8.234     | 11696425 | 903318 | 92.607  | 92.381   |
| Total |           | 12630206 | 977819 | 100.000 | 100.000  |

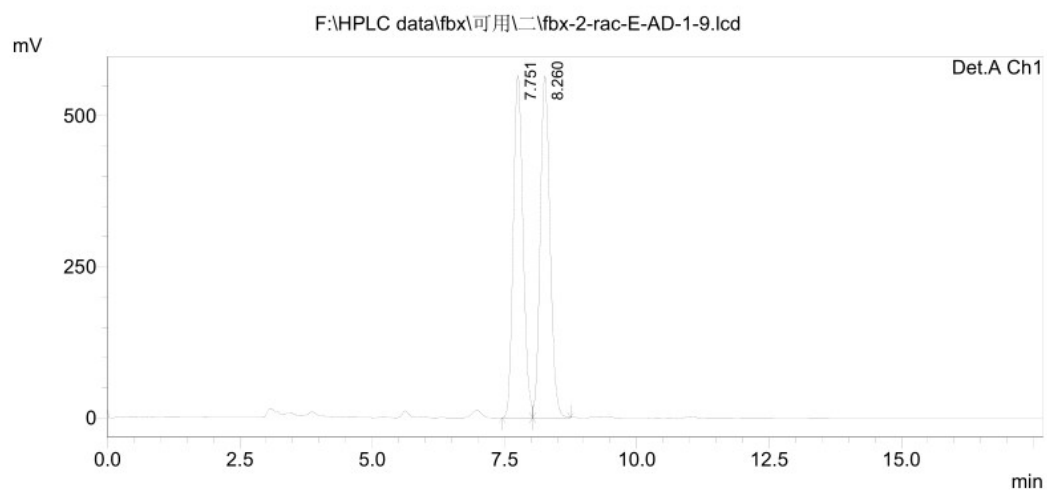

PeakTable

| Peak# | Ret. Time | Area     | Height  | Area %  | Height % |
|-------|-----------|----------|---------|---------|----------|
| 1     | 7.751     | 7246100  | 566503  | 49.700  | 50.026   |
| 2     | 8.260     | 7333606  | 565924  | 50.300  | 49.974   |
| Total |           | 14579706 | 1132427 | 100.000 | 100.000  |



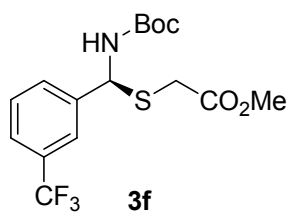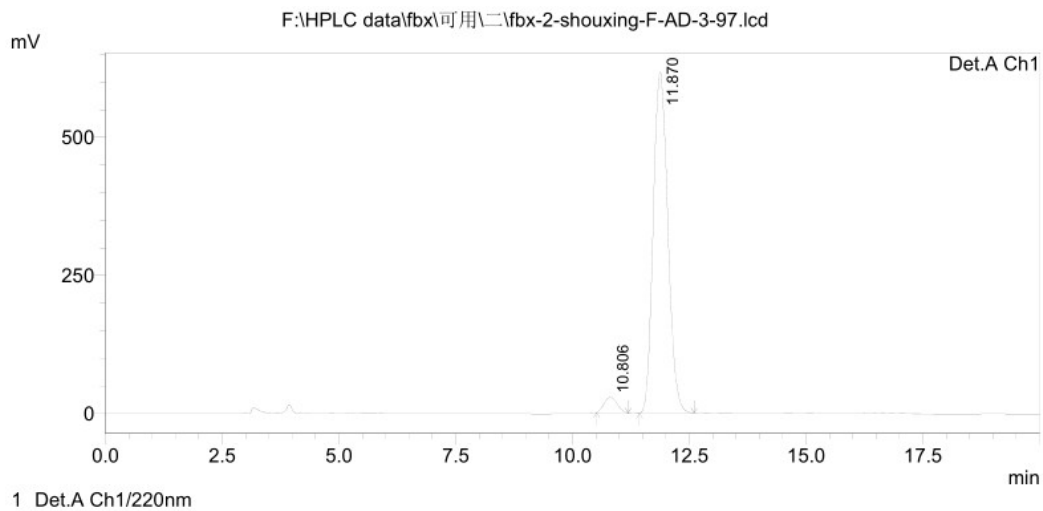

PeakTable

| Peak# | Ret. Time | Area     | Height | Area %  | Height % |
|-------|-----------|----------|--------|---------|----------|
| 1     | 10.806    | 545498   | 27965  | 3.893   | 4.334    |
| 2     | 11.870    | 13467767 | 617240 | 96.107  | 95.666   |
| Total |           | 14013265 | 645205 | 100.000 | 100.000  |

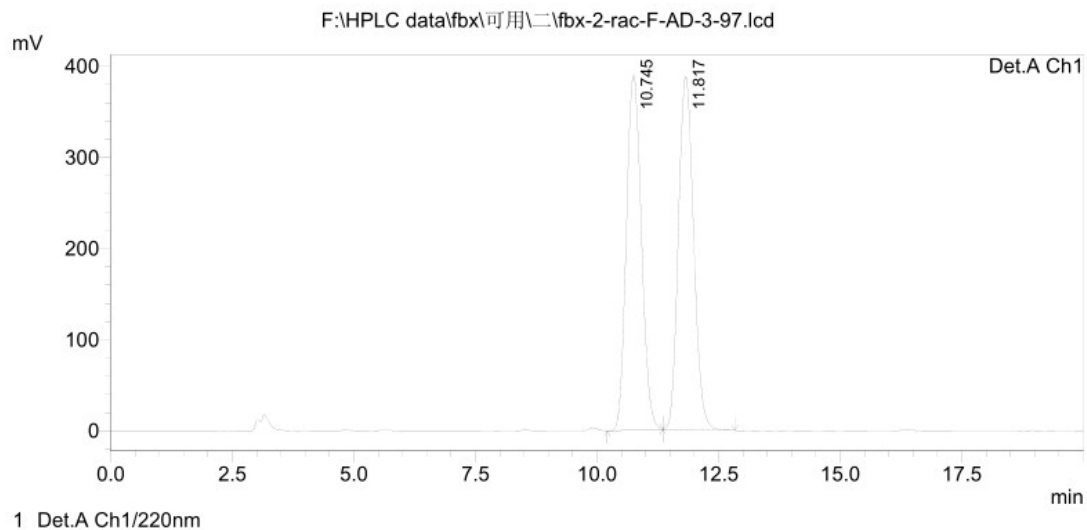

PeakTable

| Peak# | Ret. Time | Area     | Height | Area %  | Height % |
|-------|-----------|----------|--------|---------|----------|
| 1     | 10.745    | 8368135  | 390132 | 49.860  | 50.199   |
| 2     | 11.817    | 8415110  | 387046 | 50.140  | 49.801   |
| Total |           | 16783245 | 777177 | 100.000 | 100.000  |

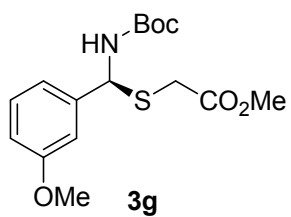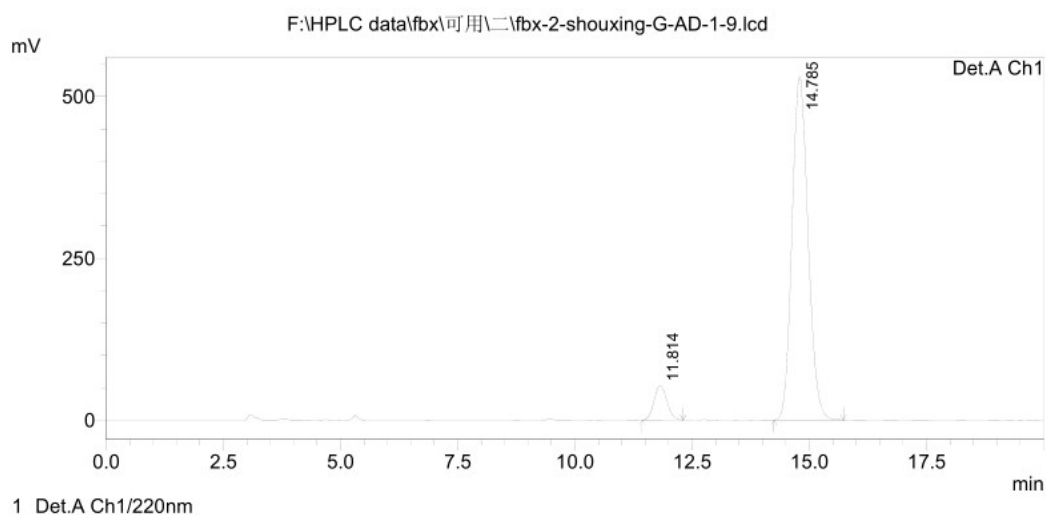

PeakTable

| Peak# | Ret. Time | Area     | Height | Area %  | Height % |
|-------|-----------|----------|--------|---------|----------|
| 1     | 11.814    | 1016972  | 53476  | 7.438   | 9.150    |
| 2     | 14.785    | 12655640 | 530950 | 92.562  | 90.850   |
| Total |           | 13672612 | 584426 | 100.000 | 100.000  |

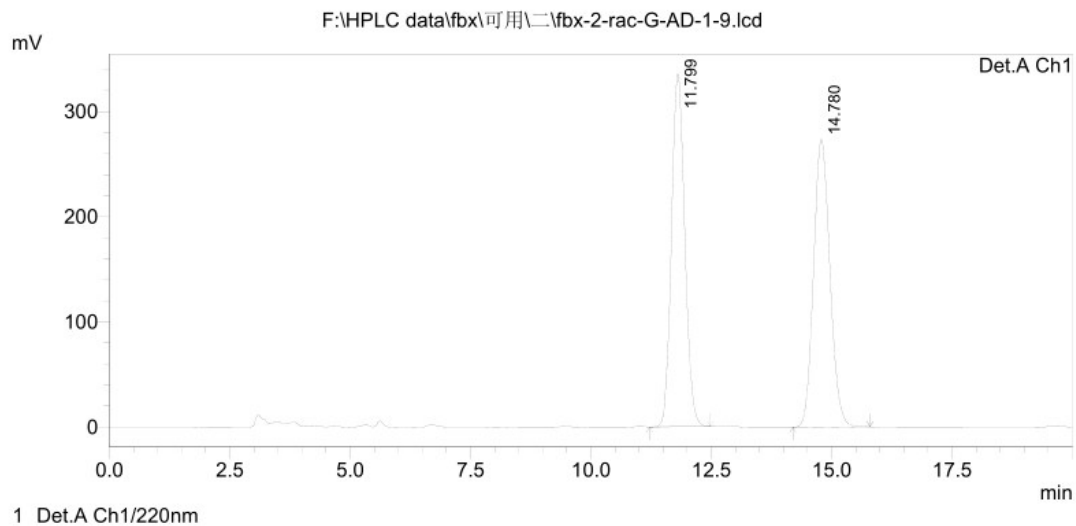

PeakTable

| Peak# | Ret. Time | Area     | Height | Area %  | Height % |
|-------|-----------|----------|--------|---------|----------|
| 1     | 11.799    | 6443518  | 335387 | 49.957  | 55.064   |
| 2     | 14.780    | 6454734  | 273699 | 50.043  | 44.936   |
| Total |           | 12898252 | 609086 | 100.000 | 100.000  |

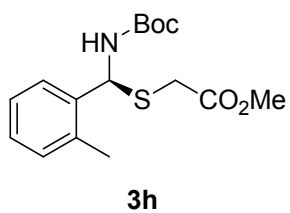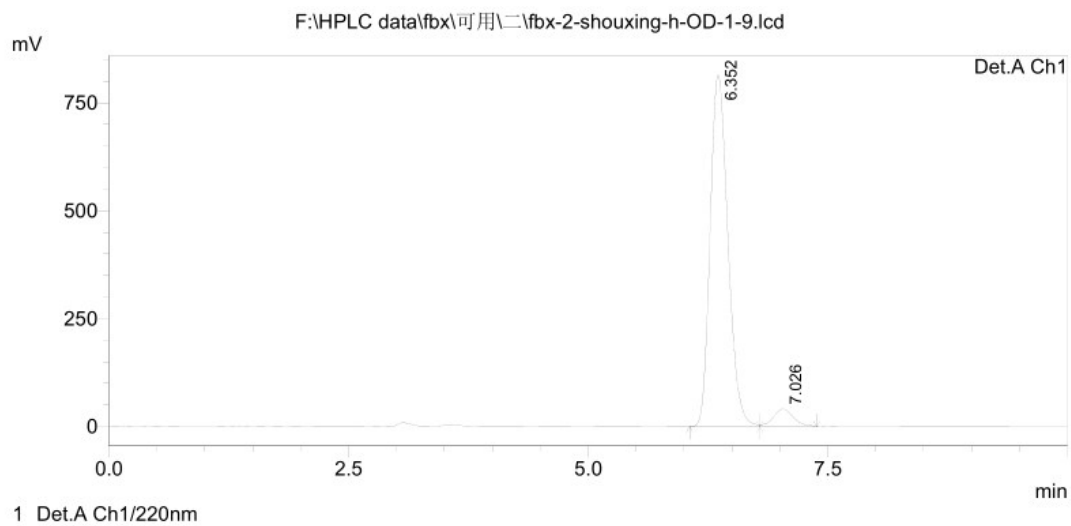

PeakTable

| Peak# | Ret. Time | Area     | Height | Area %  | Height % |
|-------|-----------|----------|--------|---------|----------|
| 1     | 6.352     | 10523686 | 814814 | 94.563  | 95.242   |
| 2     | 7.026     | 605129   | 40703  | 5.437   | 4.758    |
| Total |           | 11128815 | 855517 | 100.000 | 100.000  |

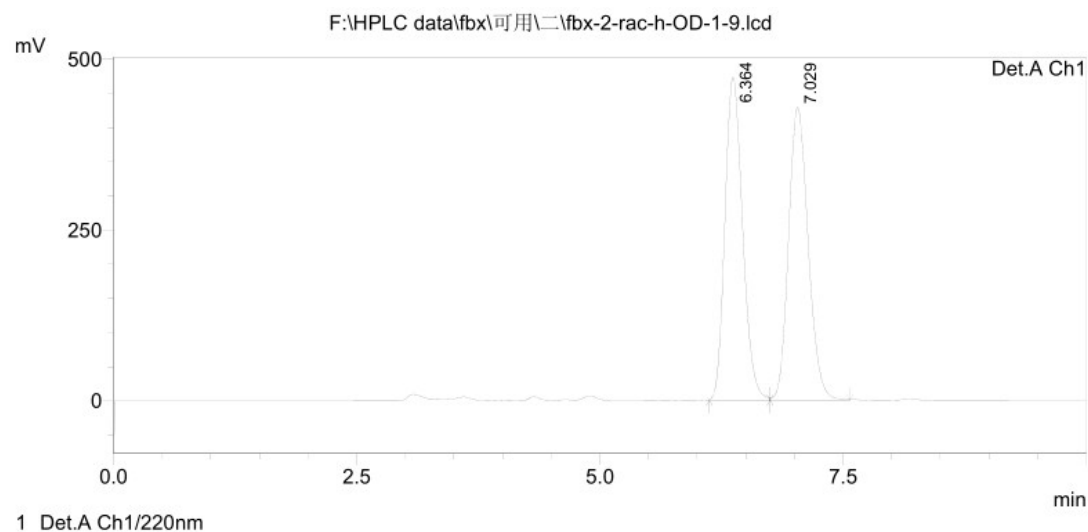

PeakTable

| Peak# | Ret. Time | Area     | Height | Area %  | Height % |
|-------|-----------|----------|--------|---------|----------|
| 1     | 6.364     | 5988616  | 473118 | 49.851  | 52.437   |
| 2     | 7.029     | 6024488  | 429146 | 50.149  | 47.563   |
| Total |           | 12013104 | 902264 | 100.000 | 100.000  |

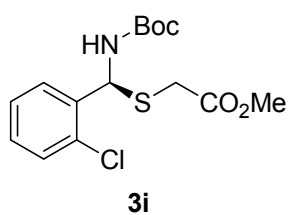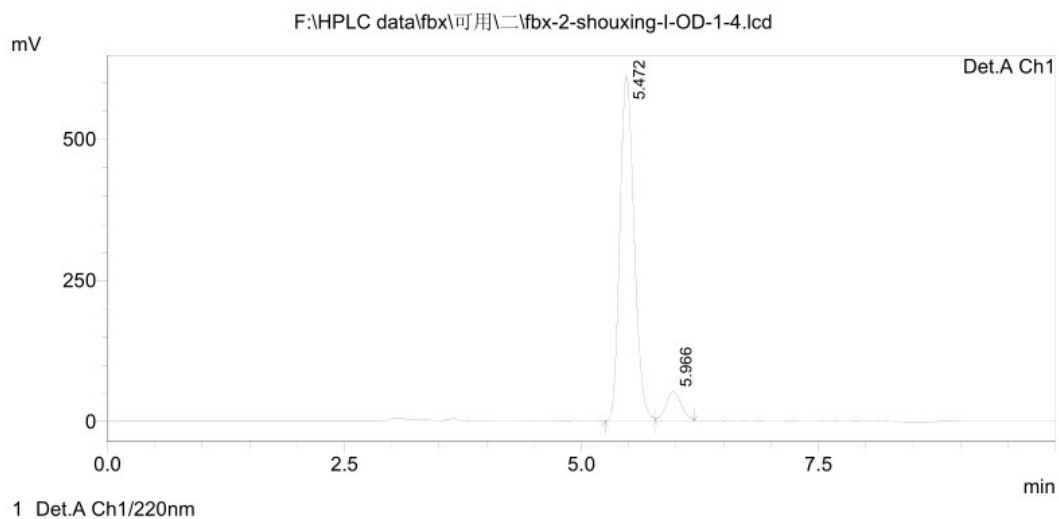

PeakTable

| Peak# | Ret. Time | Area    | Height | Area %  | Height % |
|-------|-----------|---------|--------|---------|----------|
| 1     | 5.472     | 6421760 | 613251 | 91.598  | 92.152   |
| 2     | 5.966     | 589086  | 52224  | 8.402   | 7.848    |
| Total |           | 7010846 | 665475 | 100.000 | 100.000  |

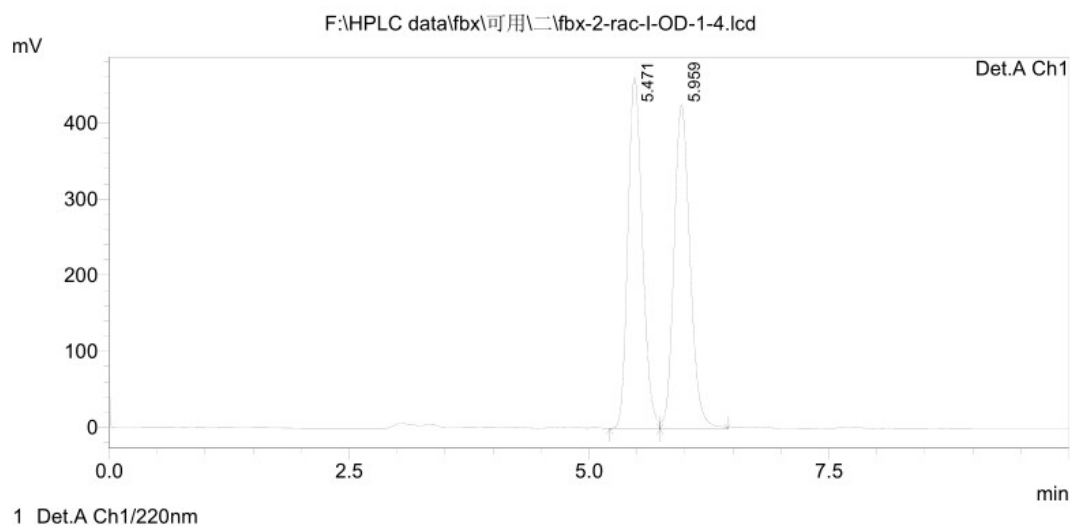

PeakTable

| Peak# | Ret. Time | Area    | Height | Area %  | Height % |
|-------|-----------|---------|--------|---------|----------|
| 1     | 5.471     | 4875175 | 462733 | 49.555  | 52.077   |
| 2     | 5.959     | 4962753 | 425815 | 50.445  | 47.923   |
| Total |           | 9837929 | 888548 | 100.000 | 100.000  |

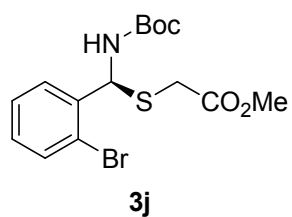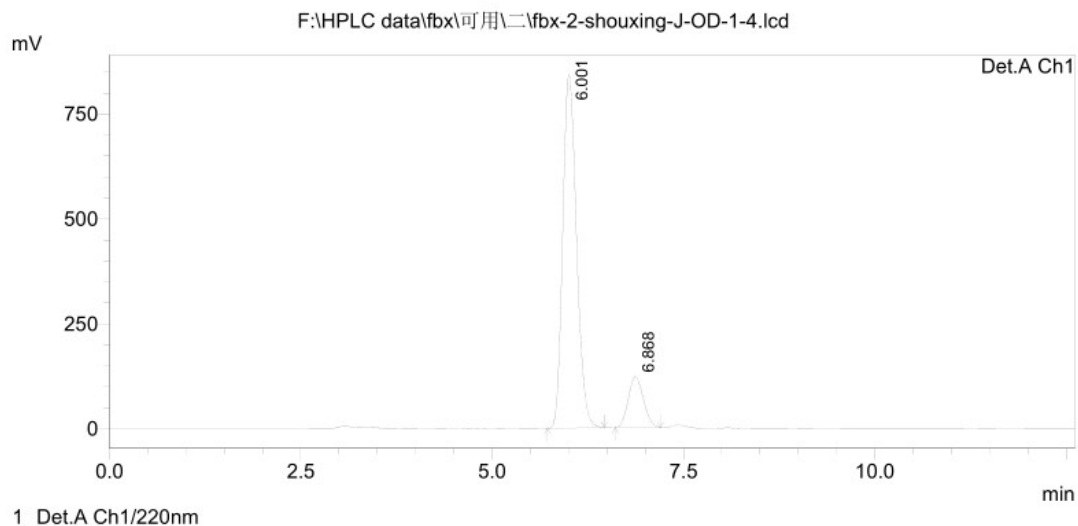

PeakTable

| Peak# | Ret. Time | Area     | Height | Area %  | Height % |
|-------|-----------|----------|--------|---------|----------|
| 1     | 6.001     | 10539502 | 842170 | 86.273  | 87.435   |
| 2     | 6.868     | 1676899  | 121029 | 13.727  | 12.565   |
| Total |           | 12216401 | 963199 | 100.000 | 100.000  |

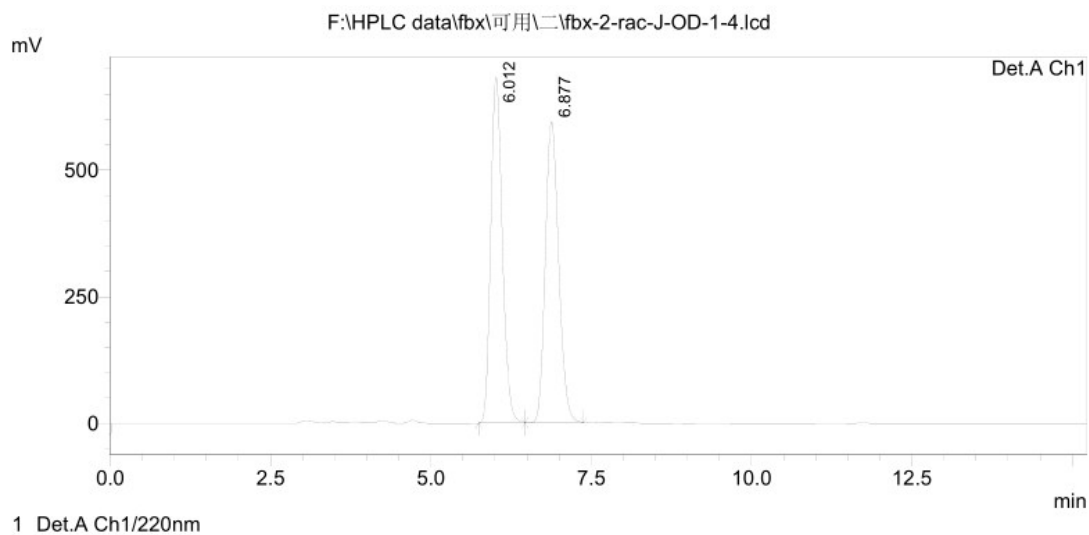

PeakTable

| Peak# | Ret. Time | Area     | Height  | Area %  | Height % |
|-------|-----------|----------|---------|---------|----------|
| 1     | 6.012     | 8564059  | 683079  | 49.816  | 53.456   |
| 2     | 6.877     | 8627344  | 594747  | 50.184  | 46.544   |
| Total |           | 17191403 | 1277827 | 100.000 | 100.000  |

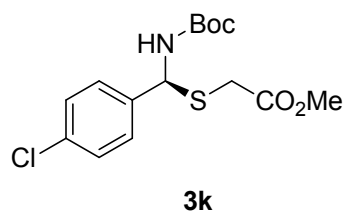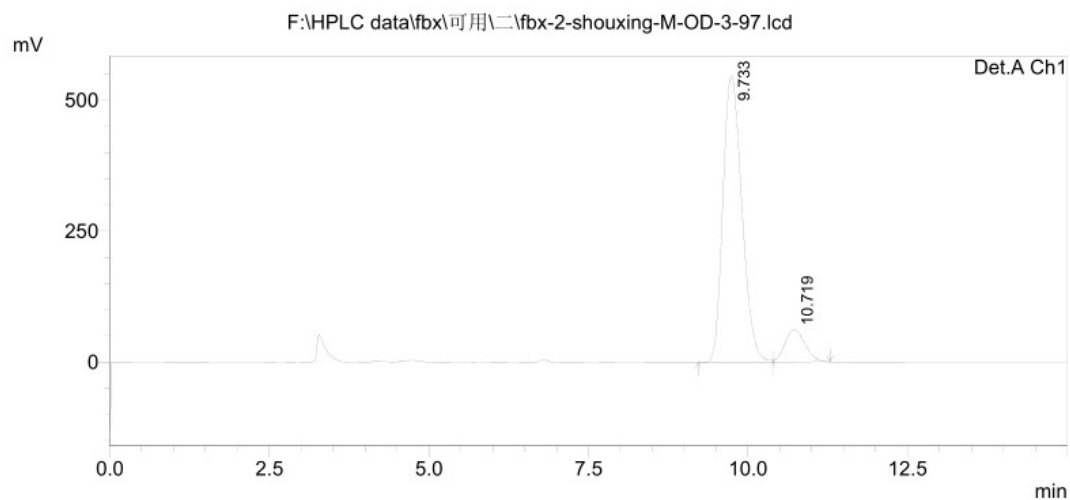

1 Det.A Ch1/210nm

PeakTable

| Detector A Ch1 210nm |           |          |        |         |          |
|----------------------|-----------|----------|--------|---------|----------|
| Peak#                | Ret. Time | Area     | Height | Area %  | Height % |
| 1                    | 9.733     | 11458288 | 548714 | 89.260  | 89.728   |
| 2                    | 10.719    | 1378631  | 62818  | 10.740  | 10.272   |
| Total                |           | 12836919 | 611532 | 100.000 | 100.000  |

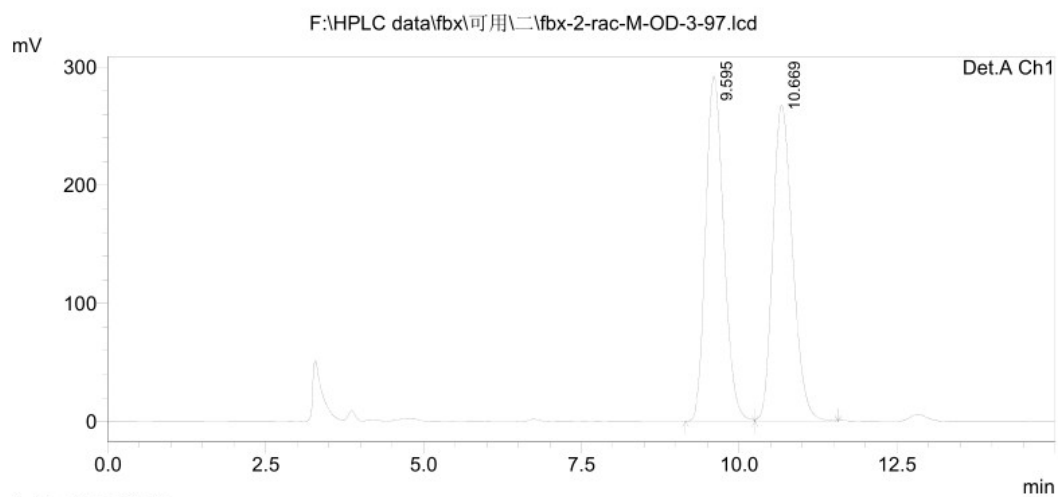

1 Det.A Ch1/210nm

PeakTable

| Detector A Ch1 210nm |           |          |        |         |          |
|----------------------|-----------|----------|--------|---------|----------|
| Peak#                | Ret. Time | Area     | Height | Area %  | Height % |
| 1                    | 9.595     | 5848522  | 292260 | 49.895  | 52.212   |
| 2                    | 10.669    | 5873144  | 267493 | 50.105  | 47.788   |
| Total                |           | 11721666 | 559752 | 100.000 | 100.000  |

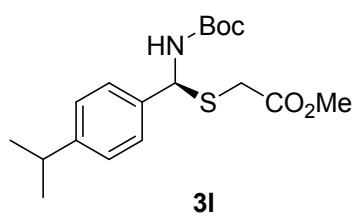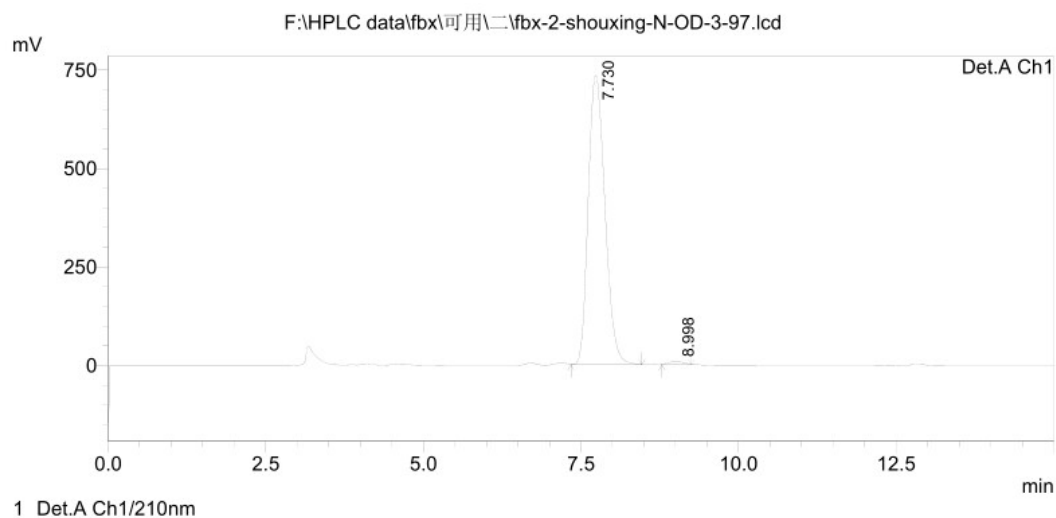

PeakTable

| Peak# | Ret. Time | Area     | Height | Area %  | Height % |
|-------|-----------|----------|--------|---------|----------|
| 1     | 7.730     | 13598600 | 735174 | 98.769  | 98.758   |
| 2     | 8.998     | 151387   | 8507   | 1.100   | 1.143    |
| 3     | 16.785    | 18087    | 742    | 0.131   | 0.100    |
| Total |           | 13768075 | 744423 | 100.000 | 100.000  |

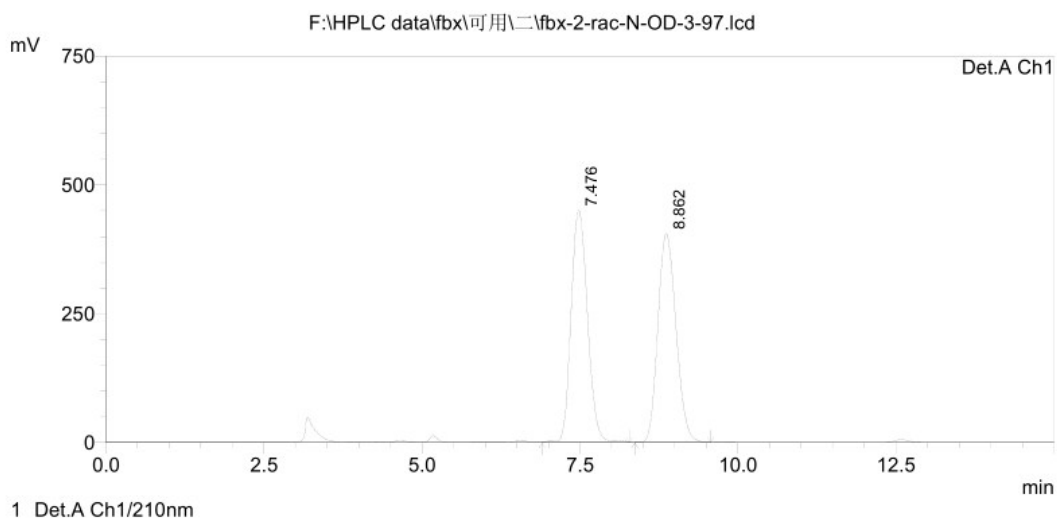

PeakTable

| Peak# | Ret. Time | Area     | Height | Area %  | Height % |
|-------|-----------|----------|--------|---------|----------|
| 1     | 7.476     | 8199286  | 450831 | 50.198  | 52.623   |
| 2     | 8.862     | 8134621  | 405892 | 49.802  | 47.377   |
| Total |           | 16333907 | 856722 | 100.000 | 100.000  |

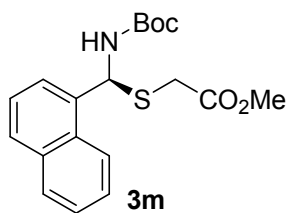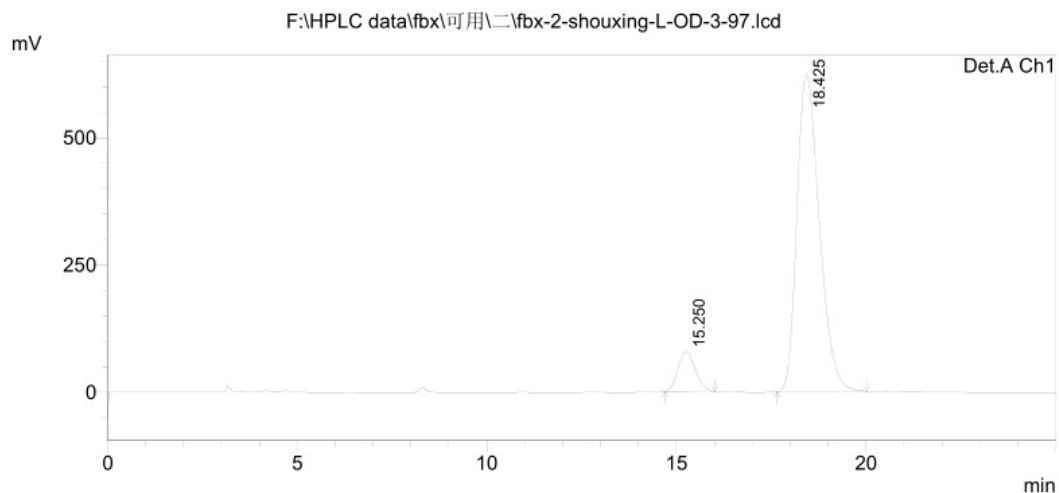

1 Det.A Ch1/220nm

PeakTable

Detector A Ch1 220nm

| Peak# | Ret. Time | Area     | Height | Area %  | Height % |
|-------|-----------|----------|--------|---------|----------|
| 1     | 15.250    | 2519766  | 78292  | 8.945   | 11.145   |
| 2     | 18.425    | 25649980 | 624165 | 91.055  | 88.855   |
| Total |           | 28169747 | 702457 | 100.000 | 100.000  |

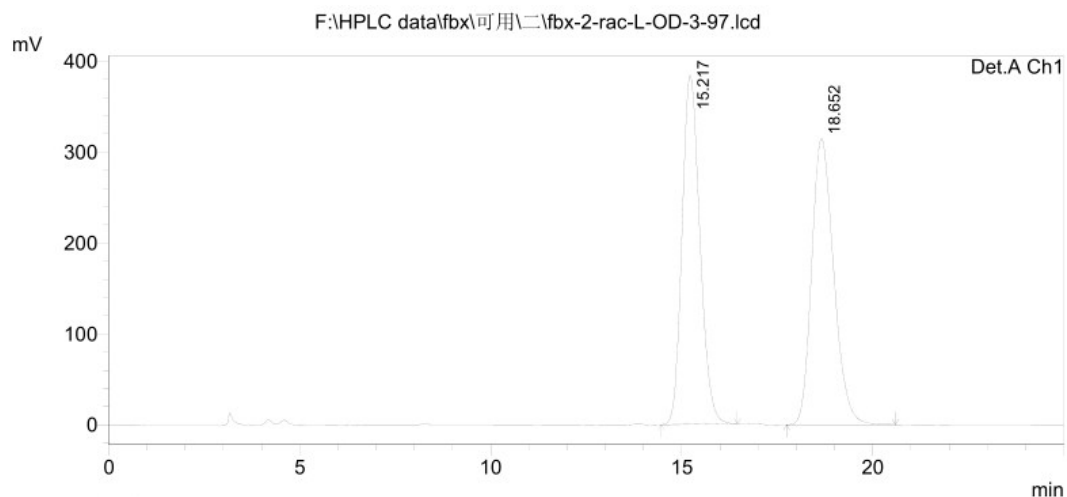

1 Det.A Ch1/220nm

PeakTable

Detector A Ch1 220nm

| Peak# | Ret. Time | Area     | Height | Area %  | Height % |
|-------|-----------|----------|--------|---------|----------|
| 1     | 15.217    | 12483193 | 384020 | 49.724  | 54.978   |
| 2     | 18.652    | 12621669 | 314473 | 50.276  | 45.022   |
| Total |           | 25104862 | 698493 | 100.000 | 100.000  |



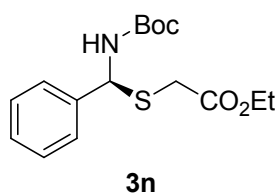

<Chromatogram>

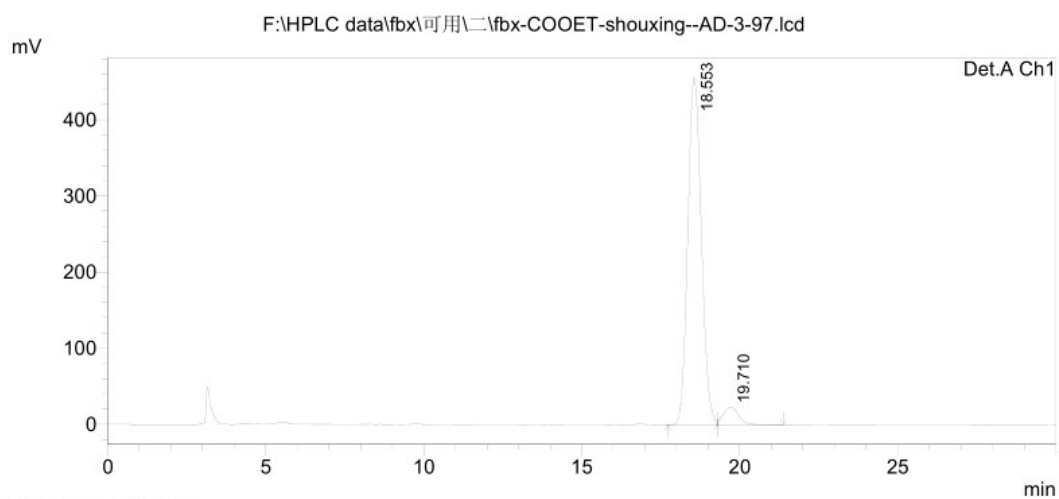

| PeakTable |           |          |        |         |          |
|-----------|-----------|----------|--------|---------|----------|
| Peak#     | Ret. Time | Area     | Height | Area %  | Height % |
| 1         | 18.553    | 13620660 | 456348 | 94.535  | 95.192   |
| 2         | 19.710    | 787469   | 23047  | 5.465   | 4.808    |
| Total     |           | 14408130 | 479395 | 100.000 | 100.000  |

<Chromatogram>

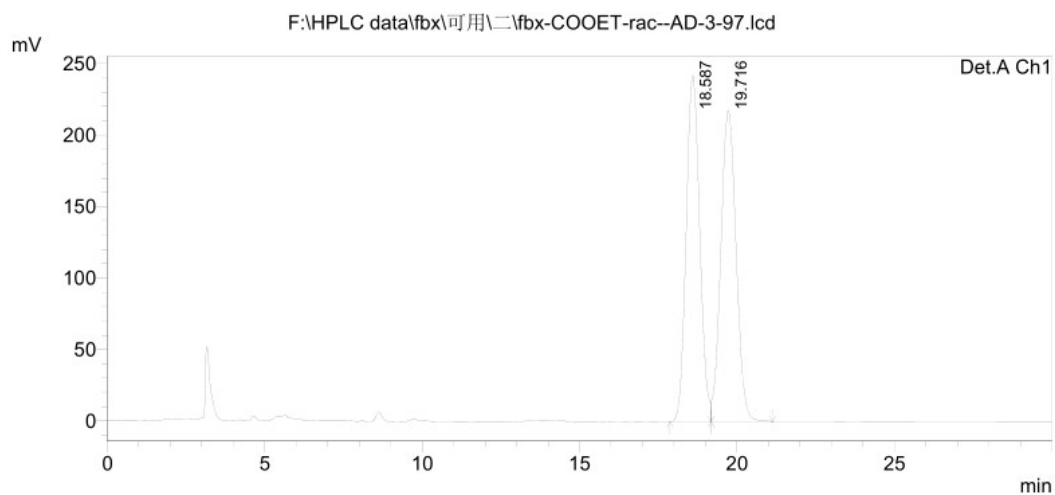

| PeakTable |           |          |        |         |          |
|-----------|-----------|----------|--------|---------|----------|
| Peak#     | Ret. Time | Area     | Height | Area %  | Height % |
| 1         | 18.587    | 7228979  | 242268 | 49.566  | 52.675   |
| 2         | 19.716    | 7355482  | 217659 | 50.434  | 47.325   |
| Total     |           | 14584461 | 459927 | 100.000 | 100.000  |

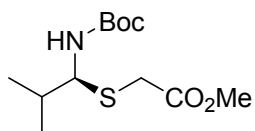

**3o**

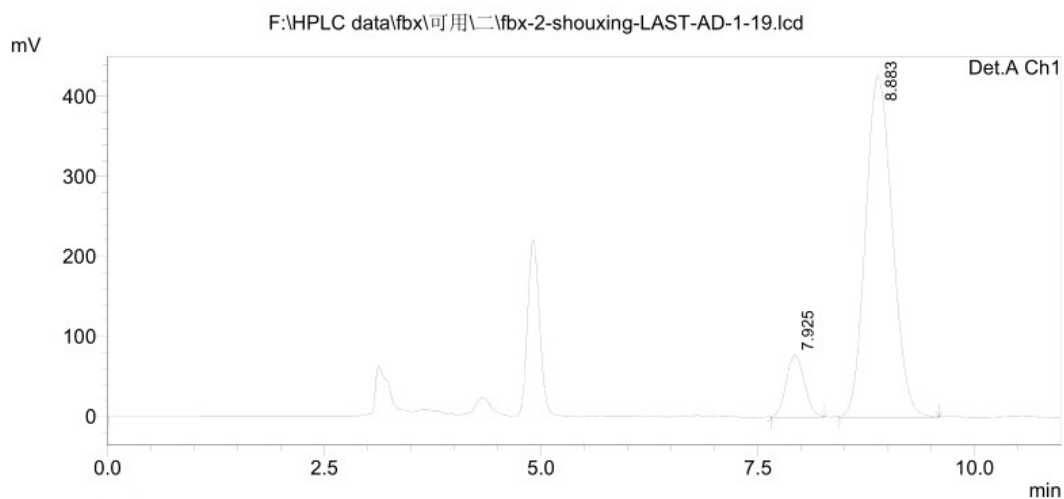

1 Det.A Ch1/210nm

| PeakTable            |           |          |        |         |          |
|----------------------|-----------|----------|--------|---------|----------|
| Detector A Ch1 210nm |           |          |        |         |          |
| Peak#                | Ret. Time | Area     | Height | Area %  | Height % |
| 1                    | 7.925     | 1130359  | 77420  | 10.967  | 15.372   |
| 2                    | 8.883     | 9176955  | 426220 | 89.033  | 84.628   |
| Total                |           | 10307314 | 503640 | 100.000 | 100.000  |

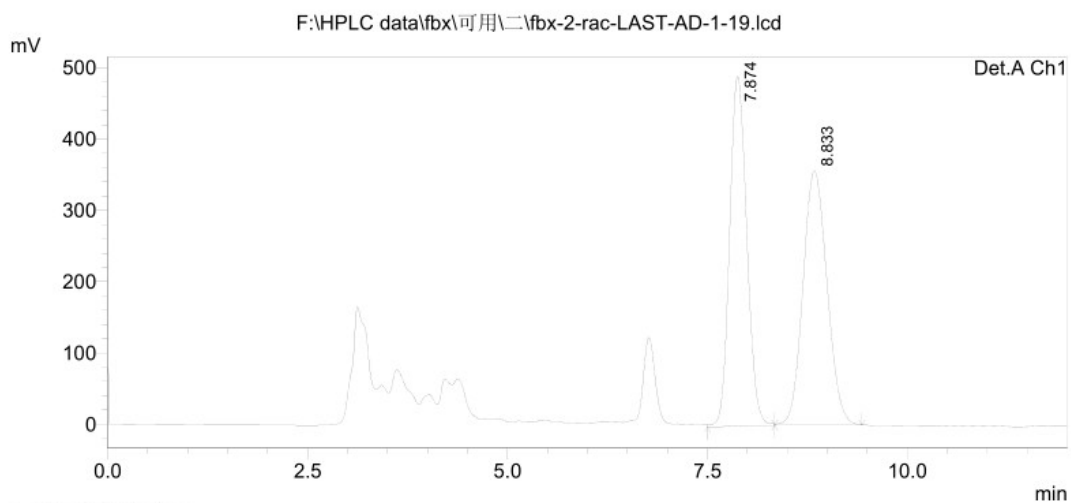

1 Det.A Ch1/210nm

| PeakTable            |           |          |        |         |          |
|----------------------|-----------|----------|--------|---------|----------|
| Detector A Ch1 210nm |           |          |        |         |          |
| Peak#                | Ret. Time | Area     | Height | Area %  | Height % |
| 1                    | 7.874     | 7318932  | 490418 | 49.465  | 57.903   |
| 2                    | 8.833     | 7477149  | 356553 | 50.535  | 42.097   |
| Total                |           | 14796081 | 846971 | 100.000 | 100.000  |

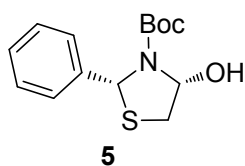

<Chromatogram>

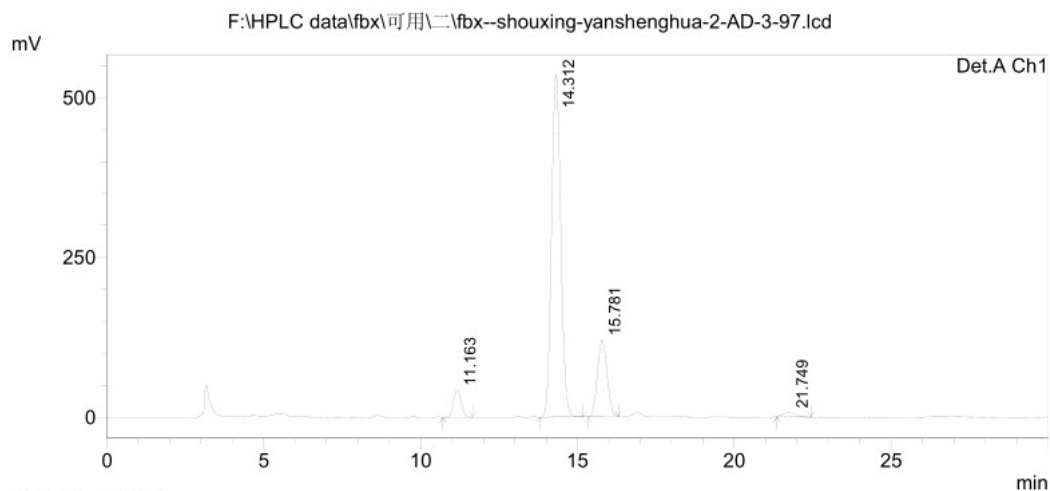

PeakTable

Detector A Ch1 210nm

| Peak# | Ret. Time | Area     | Height | Area %  | Height % |
|-------|-----------|----------|--------|---------|----------|
| 1     | 11.163    | 729463   | 42647  | 5.048   | 6.043    |
| 2     | 14.312    | 10962528 | 536552 | 75.863  | 76.029   |
| 3     | 15.781    | 2573054  | 120023 | 17.806  | 17.007   |
| 4     | 21.749    | 185362   | 6494   | 1.283   | 0.920    |
| Total |           | 14450407 | 705716 | 100.000 | 100.000  |

<Chromatogram>

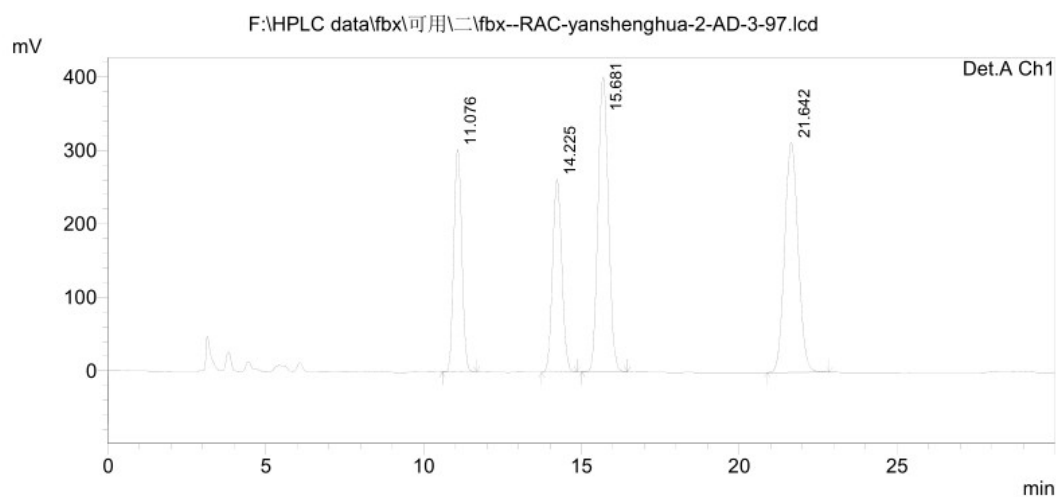

PeakTable

Detector A Ch1 210nm

| Peak# | Ret. Time | Area     | Height  | Area %  | Height % |
|-------|-----------|----------|---------|---------|----------|
| 1     | 11.076    | 5344028  | 302971  | 18.303  | 23.675   |
| 2     | 14.225    | 5356087  | 262405  | 18.345  | 20.505   |
| 3     | 15.681    | 9179643  | 401294  | 31.440  | 31.358   |
| 4     | 21.642    | 9317322  | 313059  | 31.912  | 24.463   |
| Total |           | 29197081 | 1279728 | 100.000 | 100.000  |

## Reference

1. The synthesis procedure of **1a-o**, see: (a) Q. Wang, M. van Gemmeren and B. List, *Angew. Chem. Int. Ed.*, 2014, **53**, 13592; (b) C. R. Jones, G. Dan Pantoş, A. J. Morrison and M. D. Smith, *Angew. Chem. Int. Ed.*, 2009, **48**, 7391; (c) A. J. Neuvonen and P. M. Pihko, *Org. Lett.*, 2014, **16**, 5152.
2. The synthesis procedure of **5**, see: N. Hisao, K. Takashi and Y. Susumu, EP1535906 A1, 2005.
